1 **Title: The Small GTPase OsRac1 forms two distinct immune receptor complexes**  
2 **containing the PRR OsCERK1 and the NLR Pit**

3

4 **Running head: OsRac1 forms two immune receptor complexes**

5

6 **Akira Akamatsu**<sup>1, 2, §</sup>, **Masayuki Fujiwara**<sup>2, 3, §</sup>, **Satoshi Hamada**<sup>2, §</sup>, **Megumi**  
7 **Wakabayashi**<sup>2, 4</sup>, **Ai Yao**<sup>2</sup>, **Qiong Wang**<sup>5</sup>, **Ken-ichi Kosami**<sup>6, 7</sup>, **Thu Thi Dang**<sup>2, 6, 8</sup>,  
8 **Takako Kaneko-Kawano**<sup>9</sup>, **Ko Shimamoto**<sup>2</sup>, and **Yoji Kawano**<sup>2, 6, 10, 11</sup>

9

10 <sup>1</sup> Department of Bioscience, Kwansai Gakuin University, 2-1 Gakuen, Hyogo 669-1337,  
11 Japan

12 <sup>2</sup> Graduate School of Biological Sciences, Nara Institute of Science and Technology,  
13 Nara 630-0192, Japan

14 <sup>3</sup> Yanmar Holdings Co., Ltd., Osaka 530-8311, Japan

15 <sup>4</sup> Field Solutions North East Asia, Agronomic Operations Japan, Agronomic Technology  
16 Station East Japan, Bayer CropScience K.K., Yuki, Ibaraki 307-0001, Japan

17 <sup>5</sup> Department of Horticulture and Plant Protection, Yangzhou University, Yangzhou  
18 225009, China

19 <sup>6</sup> CAS Center for Excellence in Molecular Plant Sciences, Shanghai Center for Plant  
20 Stress Biology, Chinese Academy of Sciences, Shanghai 201602, China

21 <sup>7</sup> Fruit Tree Research Center, Ehime Research Institute of Agriculture, Forestry and  
22 Fisheries, Matsuyama, Ehime 791-0112, Japan

23 <sup>8</sup> IRHS-UMR1345, Université d'Angers, INRAE, Institut Agro, SFR 4207 QuaSaV, 49071,  
24 Beaucouzé, France

25 <sup>9</sup> College of Pharmaceutical Sciences, Ritsumeikan University, Kusatsu, Shiga 525-8577,  
26 Japan

27 <sup>10</sup> Kihara Institute for Biological Research, Yokohama City University, Kanagawa 244-  
28 0813, Japan

29 <sup>11</sup> Institute of Plant Science and Resources, Okayama University, Okayama 710-0046,  
30 Japan

31

32 <sup>§</sup> These authors contributed equally to this work. Their names are in alphabetical order.

33

34

35

36 **Correspondence should be addressed to: Yoji Kawano**

37 Institute of Plant Science and Resources

38 Okayama University

39 2-20-1, Chuo, Kurashiki, Okayama 710-0046 Japan

40 Tel: +81-86-434-1242

41 E-mail: [yoji.kawano@okayama-u.ac.jp](mailto:yoji.kawano@okayama-u.ac.jp)

42

43

44

45 **Abstract:**

46 Plants employ two different types of immune receptors, cell surface pattern recognition  
47 receptors (PRRs) and intracellular nucleotide-binding and Leucine-rich repeat-containing  
48 proteins (NLRs), to cope with pathogen invasion. Both immune receptors often share  
49 similar downstream components and responses but it remains unknown whether a PRR  
50 and an NLR assemble into the same protein complex or two distinct receptor complexes.  
51 We have previously found that the small GTPase OsRac1 plays key roles in the signaling  
52 of OsCERK1, a PRR for fungal chitin, and of Pit, an NLR for rice blast fungus, and  
53 associates directly and indirectly with both of these immune receptors. In this study,  
54 using biochemical and bioimaging approaches, we reveal that OsRac1 formed two  
55 distinct receptor complexes with OsCERK1 and with Pit. Supporting this result,  
56 OsCERK1 and Pit utilized different transport systems for anchorage to the plasma  
57 membrane. Activation of OsCERK1 and Pit led to OsRac1 activation and, concomitantly,  
58 OsRac1 shifted from a small to a large protein complex fraction. We also found that the  
59 chaperone Hsp90 contributed to the proper transport of Pit to the plasma membrane and  
60 the immune induction of Pit. These findings illuminate how the PRR OsCERK1 and the  
61 NLR Pit orchestrate rice immunity through the small GTPase OsRac1.

62

63 **Keywords:** immunity, NLR, OsRac1, PRR, rice

64

65

## 66 **Introduction**

67 Plants utilize two layers of immune response to cope with pathogen infection. The first  
68 layer is known as pathogen-/microbe-associated molecular pattern (PAMP/MAMP)-  
69 triggered immunity (PTI/MTI), while the second layer is called effector-triggered immunity  
70 (ETI) (Dangl et al. 2013; Dodds and Rathjen 2010). PTI is triggered by transmembrane  
71 pattern recognition receptors (PRRs) and induces early responses (Couto and Zipfel  
72 2016). Most PRRs are categorized into two protein families consisting of receptor-like  
73 kinases (RLKs) and receptor-like proteins (RLPs) (Monaghan and Zipfel 2012). RLKs  
74 perceive signals through their extracellular domains, transmit these signals to kinase  
75 domains, and phosphorylate their downstream intracellular signaling molecules. ETI is  
76 initiated by either direct or indirect recognition of pathogen effectors by the nucleotide-  
77 binding domain and leucine-rich repeats (NLR) family proteins (Cui et al. 2015).

78 In at least some cases, PTI and ETI employ similar signaling machinery such as  $Ca^{2+}$   
79 signaling, reactive oxygen species (ROS) generation, transcriptional reprogramming,  
80 and MAP kinase (MAPK) cascade activation (Peng et al. 2018; Tsuda et al. 2013).  
81 Transcriptome analysis has revealed that the sets of genes induced by PTI and ETI  
82 overlap. However, the immune responses induced by ETI are generally more rapid,  
83 prolonged, and robust than those induced by PTI (Dodds and Rathjen 2010; Tao et al.  
84 2003; Thomma et al. 2011; Tsuda and Katagiri 2010). Moreover, PRRs and NLRs require  
85 each other to effect robust disease resistance (N'gou et al. 2020; Yuan et al. 2020).  
86 These results suggest that PTI and ETI share the same or similar signaling machinery,  
87 while their dynamics and strength are different. Qi et al. previously demonstrated that an  
88 *Arabidopsis* PRR, FLAGELLIN-SENSING 2 (FLS2), is physically associated with three  
89 plasma membrane (PM)-localized NLR proteins, RPS2, RPM1, and RPS5 (Qi et al.

90 2011). However, it is currently unclear whether physical interaction between PRRs and  
91 NLRs is a general feature and how two different types of immune receptors, PRRs and  
92 NLRs, induce similar responses.

93 Heat shock proteins (Hsps) are abundant and highly conserved proteins that  
94 accumulate in response to various stresses and serve as molecular chaperones for  
95 diverse client proteins. Hsp90 associates with many co-chaperones and cofactors to  
96 promote proper folding and maturation of client proteins (Pearl and Prodromou 2006).  
97 Previous studies have shown that Hsp90 plays critical roles in NLR functions. Indeed,  
98 suppression of HSP90 function leads to increased susceptibility to pathogens (Hubert et  
99 al. 2003; Lu et al. 2003). Hsp90 forms a complex(es) with co-chaperones such as  
100 Suppressor of G2 allele of *skp1* (SGT1) and required for *Mla12 resistance1* (RAR1)  
101 (Shirasu et al. 1999; Takahashi et al. 2003), and contributes to the stabilization of NLR  
102 proteins (Kadota and Shirasu 2012). Hsp90.7, an ER-localized Hsp, is required for the  
103 correct folding and/or complex formation of the two RLKs CLAVATA 1 and 2 to control  
104 shoot and floral meristem development (Ishiguro et al. 2002).

105 Members of the small GTPase Rac/Rop family act as molecular switches and play  
106 crucial roles in a variety of plant physiological processes (Berken 2006; Nibau et al. 2006).  
107 The small GTPase OsRac1 functions as a key regulator in both PTI and ETI in rice  
108 (Kawano et al. 2010b; Kawano et al. 2014b; Kawano and Shimamoto 2013). OsRac1  
109 contributes to PTI triggered by two elicitors, chitin and sphingolipid, derived from fungal  
110 pathogens. We have also revealed that an OsCERK1–OsRacGEF1–OsRac1 module is  
111 involved in early signaling for chitin-induced immunity (Akamatsu et al. 2015; Akamatsu  
112 et al. 2013). After sensing chitin, the chitin receptor complex containing the RLP  
113 OsCEBiP and the RLK OsCERK1 phosphorylates OsRacGEF1, which is a PRONE

114 family activator protein of OsRac1. OsCERK1-dependent phosphorylation of  
115 OsRacGEF1 leads to OsRac1 activation, resulting in the induction of immune responses.  
116 Hsp90 and its co-chaperone Hop/Sti1 complex contribute to the maturation and  
117 intracellular transport of the OsCERK1 complex (Chen et al. 2010a). Moreover, OsRac1  
118 also forms a complex(es) with various proteins including Hsp70, the scaffold protein  
119 OsRACK1, the lignin biosynthesis enzyme OsCCR1, and OsMPK6 (Kawasaki et al. 2006;  
120 Kim et al. 2012; Lieberherr et al. 2005; Nakashima et al. 2008; Thao et al. 2007). In ETI,  
121 NLR proteins employ a different mechanism to elicit OsRac1 activation from PRRs  
122 (Kawano et al. 2010a; Wang et al. 2018). Two NLR proteins, Pit and Pia, for rice blast  
123 fungus directly bind to OsSPK1, which is a DOCK family activator protein for OsRac1,  
124 and induce OsRac1 activation through OsSPK1, leading to disease resistance to rice  
125 blast fungus (Kawano et al. 2014a; Ono et al. 2001; Wang et al. 2018). So far, many  
126 players get involved in the immune complex(es) with OsRac1, however which  
127 components form a distinct complex(es) in PTI and ETI as well as their functions remain  
128 to be explored.

129 In this study, we demonstrated that OsRac1 formed two distinct immune receptor  
130 complexes with the RLK OsCERK1 and the NLR Pit. Chitin perception or induction of an  
131 active form of Pit made OsRac1 into an active form, which led to the redistribution of  
132 OsRac1 from a low to a high molecular weight complex. Hsp90 appears to play a critical  
133 role in the proper localization of Pit. These results shed light on the underlying molecular  
134 mechanisms of how PRRs and NLRs orchestrate rice immunity through the small  
135 GTPase OsRac1.

136

137

138 **Results**

139 **Two distinct immune receptor complexes: the PRR OsCERK1 and the NLR Pit**

140 The small GTPase OsRac1 functions as a downstream molecular switch for two different  
141 types of immune receptors, the PRR OsCERK1 and the NLR Pit (Akamatsu et al. 2013;  
142 Kawano et al. 2010a; Wang et al. 2018), and we therefore wondered whether the three  
143 proteins form a ternary complex or two distinct complexes. We performed an  
144 immunoprecipitation assay using rice suspension cells expressing *Myc-OsRac1* with  
145 *OsCERK1-FLAG* and/or *Pit-HA*. When *OsCERK1-FLAG* or *Pit-HA* was  
146 immunoprecipitated, OsRac1 coprecipitated with each (Fig. 1A). However, we observed  
147 no interaction between OsCERK1 and Pit even when we reciprocally precipitated both  
148 receptors, implying that OsCERK1 and Pit form two distinct immune receptor complexes  
149 with OsRac1. To validate this result in living cells, we employed two bioimaging methods.  
150 First, we tested for an interaction between OsCERK1 and Pit *in vivo* using bimolecular  
151 fluorescence complementation (BiFC) assays. To quantify the interactions in BiFC  
152 assays, we measured the frequency of reconstituted Venus-positive protoplasts in each  
153 combination of constructs. When OsCERK1 tagged with the N-terminal domain (aa 1-  
154 154) of Venus (OsCERK1-Vn) and Pit tagged with the C-terminal domain (aa 155-238)  
155 of Venus (Pit-Vc) were co-expressed in rice protoplasts, Venus fluorescence was not  
156 detected under conditions in which the known interactions between OsRac1 and Pit as  
157 well as OsCERK1 and Hop/Sti1 were confirmed (Chen et al. 2010a; Kawano et al. 2010a)  
158 (Fig. 1B). Since we have previously shown that both Pit and OsRac1 are localized at the  
159 plasma membrane through palmitoylation, a lipid modification (Chen et al. 2010b;  
160 Kawano et al. 2014a; Ono et al. 2001), we further tested the distribution of OsCERK1  
161 and Pit in living cells using variable angle epifluorescence microscopy, also called

162 variable incidence angle fluorescence microscopy (VIAFM) (Fujimoto et al. 2010;  
163 Konopka and Bednarek 2008). VIAFM is a derivative of total internal reflection  
164 fluorescence microscopy employing an evanescent wave that excites fluorescent  
165 proteins selectively in a region of the specimen beneath the glass-water interface, such  
166 as the plasma membrane and the cytoplasmic zone immediately beneath the plasma  
167 membrane of cells. We transfected rice protoplasts with *OsCERK1-mCherry* and *Pit-*  
168 *mGFP* vectors and observed the localization of the expressed proteins (Fig. 1C).  
169 *OsCERK1-mCherry* and *Pit-mGFP* showed small fluorescent particles, whereas there  
170 were no detectable particles in control mGFP-expressing cells (Supplemental Fig. 1D).  
171 The result of dual-fluorescence imaging using *OsCERK1-mCherry* and *Pit-WT-mGFP*  
172 clearly demonstrated that almost none of the *OsCERK1-mCherry* and *Pit-mCherry*  
173 particles overlapped with each other (Fig. 1C). On the other hand, *OsCERK1-mCherry*  
174 co-localized well with mEGFP-*OsCEBiP*, a co-chitin receptor (Supplemental Fig. 1E–G).  
175 Taken together, these results indicate that *OsCERK1* and *Pit* form two different immune  
176 complexes with *OsRac1*.

177

### 178 **Different signaling components and intracellular transport of *OsCERK1* and *Pit***

179 Based on a number of protein–protein interactions and functional studies, we have  
180 previously demonstrated that *OsCERK1* directly binds to chaperone Hsp90 and co-  
181 chaperone Hop/Sti1a (Chen et al. 2010a). Moreover, *OsRac1* interacts either directly or  
182 indirectly with Hsp90, its co-chaperones Hop/Sti1a, SGT1, and RAR1, the scaffold  
183 protein RACK1A, and MAP kinase MPK6, and these components play important roles in  
184 both PTI and ETI (Akamatsu et al. 2013; Chen et al. 2010a; Kawano et al. 2010a;  
185 Lieberherr et al. 2005; Nakashima et al. 2008; Thao et al. 2007). To identify the



186 components of OsCERK1 and Pit complexes, we performed an immunoprecipitation  
187 assay using rice suspension cells. The two different immune receptor complexes contain  
188 shared components including Hsp90, Hop/Sti1, and OsRac1, but they do not include the  
189 OsRac1 interactors RACK1A, RAR1, or MPK6 (Fig. 2A and 2B). Interestingly, SGT1 is  
190 a specific component in the Pit complex (Fig. 2B).

191 Generally, small GTPase Rac/Rop family proteins are localized at the plasma  
192 membrane as a result of post-translational modification (Ono et al. 2001; Yalovsky et al.  
193 2008). We have previously shown that OsRac1 localizes predominantly at the PM (Chen  
194 et al. 2010a), and that Hop/Sti1a and Hsp90 are present in the PM-rich fraction (Chen et  
195 al. 2010b). To more precisely examine the intracellular distribution of the components,  
196 we performed an aqueous two-phase partitioning experiment and found that they show  
197 three different patterns of distribution. OsRac1 localized in the plasma membrane and  
198 endomembrane fractions. Hop/Sti1a, Hsp70, and RACK1A were dispersed in the cytosol,  
199 endomembrane, and plasma membrane fractions. In contrast, Hsp90, SGT1, RAR1, and  
200 OsMPK6 were restricted mainly to the cytosol fraction, although a small proportion of  
201 Hsp90 partitioned to the plasma membrane fraction (Fig. 2C).

202 Next, we compared the intracellular transport system of OsCERK1 with that of Pit in  
203 rice protoplasts. We have previously revealed that OsCERK1 is sensitive to brefeldin A  
204 (BFA), an inhibitor of anterograde endoplasmic reticulum–Golgi transport, and is  
205 transported by a small GTPase Sar1-dependent vesicle trafficking pathway (Chen et al.  
206 2010a; Takeuchi et al. 2000) (Fig. 2D). In contrast, Pit is a palmitoylated protein and  
207 localizes at the plasma membrane in rice protoplasts (Kawano et al. 2014a), and here  
208 we revealed that Pit is insensitive to BFA (Fig. 2D), indicating that OsCERK1 and Pit  
209 employ different intracellular transport pathways to reach the plasma membrane.

210

211 **Monitoring the OsRac1 complex during OsCERK1-triggered immunity**

212 To monitor the time course of OsRac1 activation after treatment with the fungal PAMP  
213 chitin, we employed a GST-PAK CRIB pull-down assay. This method exploits the  
214 Cdc42/Rac interactive binding (CRIB) domain of the Rac effector PAK1 (PAK CRIB),  
215 which shows a high affinity only for the active GTP-bound form of Rac, and not for the  
216 inactive GDP-bound form. This feature provides a useful tool to monitor the activation  
217 state of OsRac1 *in vivo* (Kawano et al. 2010a; Sander et al. 1998). As shown in Fig. 3A,  
218 a constitutively active mutant of OsRac1 (CA-OsRac1) specifically bound to PAK CRIB  
219 but a dominant-negative mutant (DN-OsRac1) did not, indicating that PAK CRIB should  
220 efficiently isolate the active GTP-bound form of OsRac1 from the crude cell lysate of  
221 suspension cells. Next, therefore, we prepared rice suspension cells expressing *myc-*  
222 *OsRac1 WT* to monitor the OsRac1 activation state after chitin treatment. A pull-down  
223 assay revealed statistically significant OsRac1 activation, beginning by 10 min after chitin  
224 treatment and lasting until at least 60 min (Fig. 3B). We investigated the dynamics of the  
225 OsRac1 complex by gel filtration and found that OsRac1 was divided into two groups:  
226 the high molecular weight OsRac1 fractions (HOR) (fractions 23–25; about 300 kDa) and  
227 the low molecular weight OsRac1 fractions (LOR) (fractions 29–31; about 50 kDa) (Fig.  
228 3C). Intriguingly, a shift of WT OsRac1 from LOR to HOR was observed after a 10-min  
229 chitin treatment. We compared activation levels of OsRac1 between LOR and HOR using  
230 a GST-PAK CRIB pull-down assay. In the absence of chitin, total OsRac1 was distributed  
231 predominantly in LOR and gradually moved to HOR after chitin treatment (Fig. 3D, lower  
232 panel). Concomitantly, the active GTP form of OsRac1 was increased in HOR (Fig. 3D,  
233 higher panel), implying that activation of OsRac1 promotes the shift to HOR. To test this

234 hypothesis, we carried out a gel filtration assay using rice suspension cells expressing  
235 CA-OsRac1 and DN-OsRac1 (Fig. 3E). CA-OsRac1 was distributed exclusively in HOR,  
236 while DN-OsRac1 existed mainly in LOR. Next, we measured the amount of OsRac1 in  
237 the OsCERK1 complex after chitin treatment and found that chitin treatment induced the  
238 dissociation of OsRac1 from OsCERK1, but there were no obvious changes in the other  
239 components (Fig. 3F).

240

#### 241 **Monitoring the OsRac1 complex during Pit-triggered immunity**

242 The active form of Pit activates OsRac1, and this activation seems to be critical for the  
243 induction of disease resistance to rice blast fungus (Kawano et al. 2010a; Wang et al.  
244 2018). To examine the dynamics of the Pit complex, we generated rice suspension cells  
245 expressing *myc-OsRac1* WT and either *Pit* WT-FLAG or *Pit* D485V-FLAG, which is a  
246 constitutively active mutant and triggers OsRac1 activation and cell death without fungus  
247 infection, under control of an estradiol-inducible promoter. We first checked the induction  
248 of *Pit* D485V-FLAG by estradiol at the RNA and protein levels (Fig. 4A). *Pit* D485V-FLAG  
249 mRNA was detected by RT-PCR after 1 h of estradiol treatment and gradually increased  
250 until 16 h. Correspondingly, a very faint band of Pit D485V-FLAG protein was observed  
251 4 h after estradiol treatment began, and the protein had accumulated by 8 h. To analyze  
252 OsRac1 activation by Pit, we performed GST-pull down using GST-PAK CRIB (Fig. 4B).  
253 Induction of Pit D485V-FLAG by estradiol triggered activation of OsRac1; in contrast,  
254 induction of Pit WT-FLAG did not activate OsRac1 (Fig. 4B). Consistent with this, the  
255 transcript level of the defense gene *PAL1* in the Pit D485V cell line increased upon  
256 estradiol treatment (Fig. 4C). Similar to OsRac1 dynamics after chitin treatment, the ratio  
257 of HOR to LOR after the addition of estradiol was higher than that before the estradiol

258 treatment, suggesting that OsRac1 shifts from LOR to HOR as a consequence of the  
259 expression of *Pit D485V* (Fig. 4D). Next, we tested whether chitin treatment affects  
260 OsRac1–Pit interaction and found that OsRac1 was dissociated from Pit by the addition  
261 of chitin (Fig. 4E), implying that there is crosstalk between OsCERK1 signaling and Pit  
262 signaling.

263

### 264 **Hsp90 is an essential component of Pit-dependent immunity**

265 Since Hsp90 is critical for stabilizing several NLR proteins (Hubert et al. 2003; Kadota  
266 and Shirasu 2012; Takahashi et al. 2003), its roles in ETI have been determined using  
267 an Hsp90-specific inhibitor, geldanamycin (GDA). To clarify the role of Hsp90 in Pit-  
268 induced defense responses, we tested the effect of GDA on Pit D485V-induced cell  
269 death and ROS production in *Nicotiana benthamiana*. Overexpression of the  
270 constitutively active mutant Pit D485V triggered cell death and ROS production, but this  
271 effect was suppressed by the co-infiltration of GDA (Fig. 5A) and the knockdown of  
272 endogenous *NbHsp90* by virus-induced gene silencing (Fig. 5B). Consistent with these  
273 observations, *PAL1* induction by Pit D485V-FLAG was attenuated by GDA treatment in  
274 rice suspension cells (Fig. 5C), indicating that proper Hsp90 activity is required for Pit-  
275 induced immunity.

276 Finally, we monitored the localization of Pit in the presence of GDA in rice protoplasts.  
277 As we have reported previously, Pit WT-Venus was localized in the plasma membrane,  
278 but the addition of GDA abolished this plasma membrane localization of Pit WT and it  
279 accumulated instead in the cytosol (Fig. 5D). We could not observe a fluorescent signal  
280 of the constitutively active mutant Pit D485V-Venus in the absence of GDA, probably  
281 due to cell death. Interestingly, a clear fluorescent signal of Pit D485V-Venus was

282 detected at the perinuclear region in the presence of GDA. This result implies that Hsp90  
283 contributes to the maturation and/or proper plasma membrane localization of Pit and that  
284 it is indispensable for Pit's function.

285

## 286 **Discussion**

### 287 **OsRac1 is a component of two distinct receptor complexes**

288 OsRac1 is one of the critical regulators in rice immunity, working with two different types  
289 of immune receptors, the PRR OsCERK1 and the NLR Pit (Akamatsu et al. 2013;  
290 Kawano et al. 2010a; Wang et al. 2018). Consistent with this, we here showed that  
291 OsRac1 was associated with both OsCERK1 and Pit but formed two distinct receptor  
292 complexes (Fig. 1 and 2). It appears that OsRac1 does not interact directly with  
293 OsCERK1 but requires a mediator protein, Hop/Sti1, to bind to OsCERK1 (Chen et al.  
294 2010a). In contrast, OsRac1 associates directly with the NB-ARC domain of Pit (Kawano  
295 et al. 2010a). In general, PTI and ETI employ common signaling pathways such as ROS  
296 and the MAPK cascade, but immune responses by ETI are more robust and prolonged  
297 than those by PTI (Tsuda and Katagiri 2010). OsRac1 may be one of the common key  
298 machineries that control both PTI and ETI in rice. OsRac1 regulates ROS production in  
299 PTI and ETI, possibly through direct interaction with the NADPH oxidases RbohB/H  
300 (Kawasaki et al. 1999; Kosami et al. 2014; Nagano et al. 2016; Wong et al. 2007).  
301 OsRac1 forms a complex with and controls OsMPK6 at the protein level (Lieberherr et  
302 al. 2005). Further studies are needed to elucidate how OsRac1 contributes to PTI and  
303 ETI in a mechanistically different manner.

304 In this study, we revealed that although both OsCERK1 and Pit were localized in the  
305 plasma membrane (Fig. 2D), they utilize different transport systems to anchor

306 themselves to the plasma membrane. We previously found that cysteine 97 and 98 in  
307 the N-terminal CC region of Pit are palmitoylation sites that play critical roles in its  
308 membrane localization and interaction with OsRac1 (Kawano et al. 2014a).  
309 Palmitoylation, also known as S-acylation, is the reversible post-translational addition of  
310 fatty acids to proteins and serves to target proteins to specific membrane compartments  
311 and/or microdomains (Hemsley 2015). OsCERK1 depends on COPII-mediated ER-to-  
312 Golgi traffic and on the *trans*-Golgi network for its transport to the plasma membrane (Fig.  
313 2D) (Akamatsu et al. 2013; Chen et al. 2010a). Our previous BiFC analyses imply that  
314 OsRac1 is associated with OsCERK1 and Pit in different places: OsRac1 forms a  
315 complex with OsCERK1 through Hop/Sti1 possibly in the ER (Chen et al. 2010a) and  
316 with Pit at the plasma membrane (Kawano et al. 2014a), supporting our new observation  
317 that OsRac1 participates in distinct OsCERK1- and Pit-containing immune receptor  
318 complexes (Fig. 2).

319

### 320 **OsRac1 assembles into large protein complexes during PTI and ETI**

321 Gel filtration and pull-down assay using GST-PAK CRIB revealed that the activation of  
322 OsCERK1 and Pit led in turn to OsRac1 activation, which induced a shift of OsRac1 from  
323 the LOR to the HOR, suggesting that OsRac1 activation by OsCERK1 and Pit activation  
324 assembles in the large protein complexes. OsRac1 belongs to the Rac/Rop family of  
325 small GTPases, which function as a molecular switch by cycling between GDP-bound  
326 inactive and GTP-bound active forms in cells (Kawano et al. 2014b). The active GTP-  
327 bound form of Rac/Rop binds to downstream target proteins to control various cellular  
328 events (Kawano et al. 2014b). Until now, we have identified various direct downstream  
329 target proteins of OsRac1, including the NADPH oxidases RbohB/H (Kosami et al. 2014;

330 Nagano et al. 2016; Wong et al. 2007), the lignin biosynthesis key enzyme cinnamoyl-  
331 CoA reductase (Kawasaki et al. 2006), the co-chaperones Hop/Sti1, and the scaffold  
332 protein RACK1 (Nakashima et al. 2008). The direct binding of OsRac1 to these  
333 downstream target proteins probably causes the shift of OsRac1 from the LOR to the  
334 HOR. We previously proposed that the OsCERK1–OsRacGEF1–OsRac1 module is one  
335 of the key components in chitin signaling in rice (Akamatsu et al. 2013). Here, we  
336 observed that the majority of OsRac1 existed in the LOR in the absence of chitin, and  
337 we found no obvious increment of OsRac1 protein in the OsCERK1 complex after chitin  
338 treatment, implying that the association of OsRac1 with OsRacGEF1 in the OsCERK1  
339 complex is transient.

340

#### 341 **Roles of chaperones and co-chaperones in plant immunity**

342 Here, we revealed that both OsCERK1 and Pit are also associated with the core  
343 chaperones Hsp90 and Hsp70 and the co-chaperone Hop/Sti1, and that SGT1 is a  
344 specific component of the Pit complex (Fig. 2A and 2B). We previously found that Hsp90  
345 and Hop/Sti1 directly bind to OsCERK1 at the endoplasmic reticulum and contribute to  
346 the maturation of OsCERK1 and its transport to the plasma membrane (Chen et al.  
347 2010a). Interactions between Hsp90 and various NLR proteins including RPM1, N, MLA1,  
348 MLA6, and Bs2 have been reported, and the LRR domain is likely an important site for  
349 NLR protein binding to Hsp90' (Bieri et al. 2004; Hubert et al. 2003; Leister et al. 2005;  
350 Liu et al. 2004). One of the major roles for the Hsp90–SGT1–RAR1 complex is  
351 apparently to stabilize NLR proteins. GDA treatment or knockdown or knockout of *Hsp90*,  
352 *SGT1*, and *RAR1* compromises the plant's disease resistance to pathogens and reduces  
353 the levels of NLR proteins (Kadota et al. 2010). The complex presumably controls the

354 active/inactive state of NLR proteins. The pepper NLR protein Bs2 an intramolecular  
355 interaction between NB and LRR domains and this intramolecular interaction\_that was  
356 abolished' by silencing *SGT1* (Leister et al. 2005), implying that SGT1 participates in the  
357 intramolecular interactions within NLR proteins. In this study, we revealed that the  
358 attenuation of Hsp90 expression or function compromised Pit-induced immune  
359 responses. Moreover, GDA treatment perturbed the plasma membrane localization of  
360 Pit (Fig. 5D). Taken together, these results suggest that the proper function of Pit requires  
361 the correct maturation of Pit by Hsp90. Further research is necessary to understand how  
362 their chaperones and co-chaperones orchestrate OsCERK1 and Pit.  
363  
364



## 365 **Materials and Methods**

### 366 **Plasmid constructs**

367 The cDNAs of *Pit*, *OsCERK1*, and *OsRac1* were described previously (Chen et al.  
368 2010a; Kawano et al. 2010a). They were transferred into various vectors, depending on  
369 the experiment. These included pBI221-Vn-Gateway, pBI221-Gateway-Vc (provided by  
370 Dr. Seiji Takayama, University of Tokyo), and 35S-Gateway-Venus/GFP. We generated  
371 three pZH2B vectors containing the *Ubiquitin* promoter (*UbqPro*)-*4xmyc-OsRac1 wild*  
372 *type (WT)*-NOS terminator (*NOSTer*)-*UbqPro-OsCERK1-3xFLAG-NosTer* (Fig.  
373 2A), *UbqPro-4xmyc-OsRac1 WT-NOSTer-UbqPro-Pit WT-3xFLAG-NosTer* (Fig. 2B),  
374 and *UbqPro-4xmyc-OsRac1 WT-NOSTer-UbqPro-OsCERK1-3xFLAG-NosTer-*  
375 *UbqPro-PitxFLAG-NosTer* (Fig. 1A) by multiple steps of PCR, subcloning, and  
376 enzymatic digestion. We also produced two estradiol-inducible vectors pER8-*Pit WT* and  
377 *D485V-3xFLAG* with *UbqPro-4xmyc-OsRac1-NosTer* (Fig. 4) (pER8 was provided by Dr.  
378 Nam-Hai Chua, Rockefeller University). pGPVX:Hsp90 (10-186) was generated using  
379 pGPVX:Hsp90 (10-186) vector (provided by Dr. Ken-Ichiro Taoka, Yokohama City  
380 University) containing the backbone of pGreen (Hellens et al. 2000), 35S promoter and  
381 PVX region of piX.erG3 (Tamai and Meshi 2001), and Hsp90 (10-186) (Lu et al. 2003).

382

### 383 **Transgenic plants**

384 Rice (*Oryza sativa* L. cv. Kinmaze) was used as the wild type and parental cultivar for  
385 the transgenic studies. Transgenic rice plants were generated using *Agrobacterium-*  
386 mediated transformation of rice calli (Hiei et al. 1994), and hygromycin-resistant plants  
387 were regenerated from transformed callus.

388

### 389 **Immunoprecipitation assay**

390 For co-IP assay, 500 mg of rice cultured suspension cells frozen in liquid nitrogen or rice  
391 leaf blade samples were homogenized using a mortar with 1 ml of protein extraction  
392 buffer [50 mM Tris, pH 7.5, 2 mM EDTA, 150 mM NaCl, 5 mM MgCl<sub>2</sub>, 10% glycerol, 0.8%  
393 (w/v) Triton X-100, 1× protease inhibitor cocktail, and phosphatase inhibitor cocktail 1  
394 and 2 (Sigma)]. After a 20-min incubation on ice, the homogenized samples were  
395 centrifuged at 20,000 × *g* for 20 min, and the resultant supernatants were collected.  
396 Using the BCA Protein Assay Reagent (Pierce), the protein concentration of the  
397 supernatants was measured and adjusted to 5 mg/ml protein with the protein extraction  
398 buffer. For co-IP of Myc-tagged and HA-tagged proteins, the μMACS c-myc Isolation Kit  
399 and μMACS HA Isolation Kit (Miltenyi Biotec) were used according to the instructions  
400 provided. For co-IP of FLAG-tag proteins, Immunoprecipitation Kit-Dynabeads protein G  
401 (Invitrogen) and Anti-FLAG M2 Monoclonal Antibody (Sigma-Aldrich) were used  
402 according to the instructions provided.

403

### 404 **BiFC assay**

405 For use in BiFC experiments, *OsCERK1*, *Pit* and *OsRac1*, *Hop/Sti1a*, and *OsFLS2* were  
406 cloned into BiFC vectors, which were then purified using the Purelink Plasmid Midiprep  
407 Kit (Invitrogen) and introduced into rice protoplasts as described previously (Kawano et  
408 al. 2014a; Wong et al. 2018). The mCherry expression plasmid was introduced  
409 simultaneously as a marker for transformed cells. BiFC images were acquired using a  
410 TCS SP5 confocal microscope (Leica).

411

412 **VIAFM observation**

413 *Pit* and *OsCERK1* were cloned into the *p35S-Gateway-mEGFP* and *-mCherry vectors*,  
414 respectively, for C-terminal fusion using LR reactions (Thermo Fisher Scientific). Rice  
415 protoplasts were transformed with these vectors as described previously (Wong et al.  
416 2018). Ten to twelve hours after transformation, the cells were placed on a cover glass  
417 (25 × 60 mm, NO.1; Matsunami) and then covered with another cover glass (25 × 40  
418 mm, NO.1; Matsunami) thinly coated with low gelling temperature agarose (Sigma, cat.  
419 no. A9414). VIAFM images were acquired using an Olympus TIRF system based on an  
420 Olympus IX81 equipped with an APON 60XO TIRF (N.A.: 1.49). mEGFP and mCherry  
421 were excited with 488- and 561-nm lasers, respectively.

422

423 **Subcellular localization in rice protoplasts**

424 Venus was fused to either the C or the N terminus of *Pit* using the Gateway system  
425 (Invitrogen). The *Pit-Venus*, *mCherry*, and *Cerulean-NLS* constructs were controlled by  
426 the *CaMV 35S* promoter. Protoplast isolation from rice *Oc* suspension cultures and  
427 protoplast transformations were performed as described (Wong et al. 2018). Some of the  
428 transfected cells were treated with BFA (50 µg/ml: Sigma) and GDA (10 µM: Sigma).  
429 After incubation for 16 h at 30°C, the protoplasts were observed with a Leica TCS-SP5  
430 microscope.

431

432 **Gel filtration**

433 One hundred fifty milligrams of rice cell culture was ground in liquid nitrogen and  
434 extracted in 1 ml of protein extraction buffer for 20 min at 4°C. The extracts were  
435 centrifuged at 20,000 × *g* for 20 min at 4°C, and the supernatant was filtered through a

436 0.22- $\mu$ m filter (Millipore). The filtrate was applied to a Superdex 200 column (GE  
437 Healthcare) attached to an AKTA Explorer system (GE Healthcare) using protein  
438 extraction buffer as the running buffer. LMW and HMW Gel Filtration calibration kits (GE  
439 Healthcare) were used to estimate the molecular weight of protein complexes. Fractions  
440 of 0.5 ml each were collected and 45- $\mu$ l aliquots were concentrated by TCA/acetone  
441 precipitation. The precipitate was dissolved in 15  $\mu$ l of SDS-PAGE sample buffer and  
442 treated for 20 min at 60°C. These samples were subjected to SDS-PAGE and  
443 immunoblot analysis.

444

#### 445 **Pull-down assay using PAK CRIB**

446 Purified GST-PAK CRIB was prepared according to a previous method (Kawano et al.  
447 2010a). Rice cell cultures were ground in liquid nitrogen and extracted in 1 ml of protein  
448 extraction buffer for 20 min at 4°C. The extracts were centrifuged at 20,000  $\times g$  for 20  
449 min at 4°C, and the supernatant was collected. Protein content was determined by the  
450 BCA assay reagent (Thermo Fisher Scientific), using bovine serum albumin (BSA) as a  
451 standard. Three milligrams of the total protein samples were applied to 20  $\mu$ g of GST-  
452 PAK-CRIB glutathione Sepharose 4B for pulldown assays and rotated for 30 min at 4°C.  
453 The Sepharose was washed three times in protein extraction buffer. Proteins that  
454 remained bound to the Sepharose were eluted in 80  $\mu$ l of SDS-PAGE sample buffer and  
455 treated for 20 min at 60°C. These samples were subjected to SDS-PAGE, immunoblot  
456 analysis, and Coomassie staining.

457

#### 458 **Preparation of membrane fractions**

459 Rice cell cultures were harvested 3 days after subculture and homogenized in  
460 homogenizing medium [50 mM MOPS/KOH, pH 7.6, 5 mM EGTA, 5 mM EDTA, 0.5 M  
461 D-sorbitol, 1.5% (w/v) polyvinylpyrrolidone, 2 mM PMSF, 2.5 mM DTT]. The homogenate  
462 was filtered through Miracloth (Calbiochem), and the filtrate was centrifuged at 3,000 ×  
463 *g* for 10 min at 4°C. The supernatant was collected and centrifuged at 170,000 × *g* for  
464 35 min at 4°C to yield soluble (supernatant) and microsomal (pellet) protein fractions. A  
465 polyethylene glycol–dextran (6.4%, w/w) aqueous two-phase partitioning system  
466 (Fujiwara et al. 2009) was used to separate the plasma membrane (PM) and  
467 endomembranes (EMs). The microsomal pellets were resuspended in MS-suspension  
468 medium [10 mM potassium phosphate, pH 7.8, 300 mM sucrose] and subjected to two-  
469 phase partitioning. Both the upper phase (enriched for the PM) and the lower phase  
470 (enriched for the EMs) were partitioned three times with lower phase buffer and upper  
471 phase buffer, respectively. The PM and EM fractions were harvested by centrifugation  
472 at 170,000 × *g* for 35 min at 4°C, and resuspended in PM-suspension medium (10 mM  
473 MOPS/KOH, pH 7.3, 1 mM EGTA, 300 mM sucrose, 2 mM DTT). The protein content of  
474 the fractions was determined by the BCA assay reagent (Thermo Fisher Scientific), using  
475 BSA as a standard. These samples were subjected to SDS-PAGE and immunoblot  
476 analysis.

477

#### 478 **Immunoblotting**

479 Sample proteins were separated by SDS-PAGE and electrotransferred onto an  
480 Immobilon-P membrane (Millipore) for immunoblot detection. The membrane was  
481 blocked for 1 h in Blocking One (Nacalai Tesque) for 30 min and incubated for 30 min  
482 with anti-Myc (Nacalai Tesque) or anti-RACK1A (Nakashima et al. 2008), anti-FLAG

483 (Sigma), anti-Hop/Sti1a (Chen et al. 2010a), anti-OsCEBiP (Kaku et al. 2006), anti-  
484 Hsp90 (Enzo Life Sciences), anti-SGT1 (Azevedo et al. 2002), anti-RAR1 (Thao et al.  
485 2007), anti-OsMPK6 (Lieberherr et al. 2005), anti-tubulin (Calbiochem), anti-Bip (Cosmo  
486 Bio), and anti-OsPIP1s (Cosmo Bio) antibodies. After washing twice with TBST (0.05 M  
487 Tris, pH 7.6, 0.9% NaCl, 0.1% Triton X-100), the membranes were incubated for 2 h in  
488 Can Get Signal Solution 2 (Toyobo) with anti-rabbit or mouse IgG conjugated to  
489 horseradish peroxidase (GE Healthcare). After washing twice with TBST, chemical  
490 enhancement was performed using ECL PLUS Western blot detection reagents (GE  
491 Healthcare). The enhanced signals were detected by the LAS-4000 system (Fujifilm).

492

#### 493 **Agroinfiltration into *N. benthamiana* leaves**

494 In some experiments, we generated *pGPVX:Hsp90* (10-186) vector and virus-induced  
495 gene silencing (VIGS) was done as described by Lu *et al.* (Lu et al. 2003). Agroinfiltration  
496 of *N. benthamiana* was performed as described previously (Kawano et al. 2010a).  
497 *Agrobacterium tumefaciens* strain GV3010, harboring the helper plasmid pSoup and  
498 binary plasmids carrying the cDNAs of Pit WT and mutants, was used to infiltrate leaves  
499 of 5-week-old *N. benthamiana* plants. We used the p19 silencing suppressor to enhance  
500 gene expression. Each *Agrobacterium* culture was resuspended in a buffer containing  
501 10 mM MgCl<sub>2</sub>, 10 mM MES, pH 5.6, and 150 μM acetosyringone, and incubated at 23°C  
502 for 2–3 h before infiltration. In some experiments, we added GDA at a final concentration  
503 of 10 μM to an *Agrobacterium* culture carrying *pGWB2-Pit D485V*. The plants were kept  
504 in a growth chamber at 23°C after agroinfiltration. To visualize hydrogen peroxide, a  
505 major endogenous ROS, *in situ*, the agroinfiltrated leaves were detached and incubated  
506 in 1 μg/ml DAB solution for 2–8 h, after which they were decolorized in boiling ethanol.

507 Photographs were taken at 7 days post-inoculation (dpi) for cell death at 3 dpi for ROS  
508 production.

509

## 510 **Funding**

511 This work was supported by the Chinese Academy of Sciences, Shanghai Institutes for  
512 Biological Sciences, Shanghai Center for Plant Stress Biology, CAS Center of  
513 Excellence for Molecular Plant Sciences, Strategic Priority Research Program of the  
514 Chinese Academy of Sciences (B) (XDB27040202), the Chinese Academy of Sciences  
515 Hundred Talents Program (173176001000162114), the National Natural Science  
516 Foundation of China (31572073 and 31772246), JSPS KAKENHI (26450055, 17K07668,  
517 and 20H02988), and the Ohara Foundation. K. K. was supported by the CAS President's  
518 International Fellowship Initiative (2019PB0056). A. A. was supported by a Grant-in-Aid  
519 for Early-Career Scientists (20K15426).

520

## 521 **Disclosures**

522 Conflicts of interest: No conflicts of interest declared

523

## 524 **Acknowledgments**

525 We thank the members of the Laboratory of Plant Molecular Genetics at NAIST, the  
526 Laboratory of Signal Transduction and Immunity at PSC, and the Plant Immune Design  
527 Group at Okayama University for invaluable support and discussions.

528

529

530 **References**

- 531 Akamatsu, A., Uno, K., Kato, M., Wong, H.L., Shimamoto, K. and Kawano, Y. (2015)  
532 New insights into the dimerization of small GTPase Rac/ROP guanine nucleotide  
533 exchange factors in rice. *Plant Signal Behav* 10: e1044702.
- 534 Akamatsu, A., Wong, H., Fujiwara, M., Okuda, J., Nishide, K., Uno, K., et al. (2013) An  
535 OsCEBiP/OsCERK1-OsRacGEF1-OsRac1 module is an essential component of  
536 chitin-induced rice immunity. *Cell Host Microbe* 13: 465-476.
- 537 Azevedo, C., Sadanandom, A., Kitagawa, K., Freialdenhoven, A., Shirasu, K. and  
538 Schulze-Lefert, P. (2002) The RAR1 interactor SGT1, an essential component of  
539 R gene-triggered disease resistance. *Science* 295: 2073-2076.
- 540 Berken, A. (2006) ROPs in the spotlight of plant signal transduction. *Cell Mol Life Sci* 63:  
541 2446-2459.
- 542 Bieri, S., Mauch, S., Shen, Q.H., Peart, J., Devoto, A., Casais, C., et al. (2004) RAR1  
543 positively controls steady state levels of barley MLA resistance proteins and  
544 enables sufficient MLA6 accumulation for effective resistance. *Plant Cell* 16: 3480-  
545 3495.
- 546 Chen, L., Hamada, S., Fujiwara, M., Zhu, T., Thao, N.P., Wong, H.L., et al. (2010a) The  
547 Hop/Sti1-Hsp90 chaperone complex facilitates the maturation and transport of a  
548 PAMP receptor in rice innate immunity. *Cell Host Microbe* 7: 185-196.
- 549 Chen, L., Shiotani, K., Togashi, T., Miki, D., Aoyama, M., Wong, H.L., et al. (2010b)  
550 Analysis of the Rac/Rop small GTPase family in rice: expression, subcellular  
551 localization and role in disease resistance. *Plant Cell Physiol* 51: 585-595.
- 552 Couto, D. and Zipfel, C. (2016) Regulation of pattern recognition receptor signalling in  
553 plants. *Nat Rev Immunol* 16: 537-552.
- 554 Cui, H., Tsuda, K. and Parker, J.E. (2015) Effector-triggered immunity: from pathogen  
555 perception to robust defense. *Annu Rev Plant Biol* 66: 487-511.
- 556 Dangl, J.L., Horvath, D.M. and Staskawicz, B.J. (2013) Pivoting the plant immune system  
557 from dissection to deployment. *Science* 341: 746-751.
- 558 Dodds, P.N. and Rathjen, J.P. (2010) Plant immunity: towards an integrated view of  
559 plant-pathogen interactions. *Nat Rev Genet* 11: 539-548.
- 560 Fujimoto, M., Arimura, S., Ueda, T., Takanashi, H., Hayashi, Y., Nakano, A., et al. (2010)  
561 Arabidopsis dynamin-related proteins DRP2B and DRP1A participate together in  
562 clathrin-coated vesicle formation during endocytosis. *Proc Natl Acad Sci U S A*  
563 107: 6094-6099.



- 564 Fujiwara, M., Hamada, S., Hiratsuka, M., Fukao, Y., Kawasaki, T. and Shimamoto, K.  
565 (2009) Proteome analysis of detergent-resistant membranes (DRMs) associated  
566 with OsRac1-mediated innate immunity in rice. *Plant Cell Physiol* 50: 1191-1200.
- 567 Hellens, R.P., Edwards, E.A., Leyland, N.R., Bean, S. and Mullineaux, P.M. (2000)  
568 pGreen: a versatile and flexible binary Ti vector for Agrobacterium-mediated plant  
569 transformation. *Plant Mol Biol* 42: 819-832.
- 570 Hemsley, P.A. (2015) The importance of lipid modified proteins in plants. *New Phytol*  
571 205: 476-489.
- 572 Hiei, Y., Ohta, S., Komari, T. and Kumashiro, T. (1994) Efficient transformation of rice  
573 (*Oryza sativa* L.) mediated by Agrobacterium and sequence analysis of the  
574 boundaries of the T-DNA. *Plant J* 6: 271-282.
- 575 Hubert, D.A., Tornero, P., Belkhadir, Y., Krishna, P., Takahashi, A., Shirasu, K., et al.  
576 (2003) Cytosolic HSP90 associates with and modulates the Arabidopsis RPM1  
577 disease resistance protein. *EMBO J* 22: 5679-5689.
- 578 Ishiguro, S., Watanabe, Y., Ito, N., Nonaka, H., Takeda, N., Sakai, T., et al. (2002)  
579 SHEPHERD is the Arabidopsis GRP94 responsible for the formation of functional  
580 CLAVATA proteins. *EMBO J* 21: 898-908.
- 581 Kadota, Y. and Shirasu, K. (2012) The HSP90 complex of plants. *Biochim Biophys Acta*  
582 1823: 689-697.
- 583 Kadota, Y., Shirasu, K. and Guerois, R. (2010) NLR sensors meet at the SGT1-HSP90  
584 crossroad. *Trends Biochem Sci* 35: 199-207.
- 585 Kaku, H., Nishizawa, Y., Ishii-Minami, N., Akimoto-Tomiyama, C., Dohmae, N., Takio, K.,  
586 et al. (2006) Plant cells recognize chitin fragments for defense signaling through a  
587 plasma membrane receptor. *Proc Natl Acad Sci U S A* 103: 11086-11091.
- 588 Kawano, Y., Akamatsu, A., Hayashi, K., Housen, Y., Okuda, J., Yao, A., et al. (2010a)  
589 Activation of a Rac GTPase by the NLR family disease resistance protein Pit plays  
590 a critical role in rice innate immunity. *Cell Host Microbe* 7: 362-375.
- 591 Kawano, Y., Chen, L. and Shimamoto, K. (2010b) The function of Rac small GTPase  
592 and associated proteins in rice innate immunity. *Rice* 3: 112-121.
- 593 Kawano, Y., Fujiwara, T., Yao, A., Housen, Y., Hayashi, K. and Shimamoto, K. (2014a)  
594 Palmitoylation-dependent membrane localization of the rice resistance protein pit  
595 is critical for the activation of the small GTPase OsRac1. *J Biol Chem* 289: 19079-  
596 19088.
- 597 Kawano, Y., Kaneko-Kawano, T. and Shimamoto, K. (2014b) Rho family GTPase-  
598 dependent immunity in plants and animals. *Front in Plant Sci* 5: 522.

- 599 Kawano, Y. and Shimamoto, K. (2013) Early signaling network in rice PRR- and R-  
600 mediated immunity. *Curr Opin Plant Biol* 16: 496–504.
- 601 Kawasaki, T., Henmi, K., Ono, E., Hatakeyama, S., Iwano, M., Satoh, H., et al. (1999)  
602 The small GTP-binding protein Rac is a regulator of cell death in plants. *Proc Natl*  
603 *Acad Sci U S A* 96: 10922-10926.
- 604 Kawasaki, T., Koita, H., Nakatsubo, T., Hasegawa, K., Wakabayashi, K., Takahashi, H.,  
605 et al. (2006) Cinnamoyl-CoA reductase, a key enzyme in lignin biosynthesis, is an  
606 effector of small GTPase Rac in defense signaling in rice. *Proc Natl Acad Sci U S*  
607 *A* 103: 230-235.
- 608 Kim, S.H., Oikawa, T., Kyojuka, J., Wong, H.L., Umemura, K., Kishi-Kaboshi, M., et al.  
609 (2012) The bHLH Rac immunity1 (RAI1) is activated by OsRac1 via OsMAPK3 and  
610 OsMAPK6 in rice immunity. *Plant Cell Physiol* 53: 740-754.
- 611 Konopka, C.A. and Bednarek, S.Y. (2008) Variable-angle epifluorescence microscopy:  
612 a new way to look at protein dynamics in the plant cell cortex. *Plant J* 53: 186-196.
- 613 Kosami, K., Ohki, I., Nagano, M., Furuita, K., Sugiki, T., Kawano, Y., et al. (2014) The  
614 crystal structure of the plant small GTPase OsRac1 reveals its mode of binding to  
615 NADPH oxidase. *J Biol Chem* 289: 28569-28578.
- 616 Leister, R.T., Dahlbeck, D., Day, B., Li, Y., Chesnokova, O. and Staskawicz, B.J. (2005)  
617 Molecular genetic evidence for the role of SGT1 in the intramolecular  
618 complementation of Bs2 protein activity in *Nicotiana benthamiana*. *Plant Cell* 17:  
619 1268-1278.
- 620 Lieberherr, D., Thao, N.P., Nakashima, A., Umemura, K., Kawasaki, T. and Shimamoto,  
621 K. (2005) A sphingolipid elicitor-inducible mitogen-activated protein kinase is  
622 regulated by the small GTPase OsRac1 and heterotrimeric G-protein in rice. *Plant*  
623 *Physiol* 138: 1644-1652.
- 624 Liu, Y., Burch-Smith, T., Schiff, M., Feng, S. and Dinesh-Kumar, S.P. (2004) Molecular  
625 chaperone Hsp90 associates with resistance protein N and its signaling proteins  
626 SGT1 and Rar1 to modulate an innate immune response in plants. *J Biol Chem*  
627 279: 2101-2108.
- 628 Lu, R., Malcuit, I., Moffett, P., Ruiz, M.T., Peart, J., Wu, A.J., et al. (2003) High throughput  
629 virus-induced gene silencing implicates heat shock protein 90 in plant disease  
630 resistance. *EMBO J* 22: 5690-5699.
- 631 Monaghan, J. and Zipfel, C. (2012) Plant pattern recognition receptor complexes at the  
632 plasma membrane. *Curr Opin Plant Biol* 15: 349-357.

- 633 N'gou, B.P.M., Ahn, H.-K., Ding, P. and Jones, J. (2020) Mutual Potentiation of Plant  
634 Immunity by Cell-surface and Intracellular Receptors. *bioRxiv*  
635 <https://doi.org/10.1101/2020.04.10.034173>.
- 636 Nagano, M., Ishikawa, T., Fujiwara, M., Fukao, Y., Kawano, Y., Kawai-Yamada, M., et  
637 al. (2016) Plasma Membrane Microdomains Are Essential for Rac1-RbohB/H-  
638 Mediated Immunity in Rice. *Plant Cell* 28: 1966-1983.
- 639 Nakashima, A., Chen, L., Thao, N.P., Fujiwara, M., Wong, H.L., Kuwano, M., et al. (2008)  
640 RACK1 functions in rice innate immunity by interacting with the Rac1 immune  
641 complex. *Plant Cell* 20: 2265-2279.
- 642 Nibau, C., Wu, H.M. and Cheung, A.Y. (2006) RAC/ROP GTPases: 'hubs' for signal  
643 integration and diversification in plants. *Trends Plant Sci* 11: 309-315.
- 644 Ono, E., Wong, H.L., Kawasaki, T., Hasegawa, M., Kodama, O. and Shimamoto, K.  
645 (2001) Essential role of the small GTPase Rac in disease resistance of rice. *Proc*  
646 *Natl Acad Sci U S A* 98: 759-764.
- 647 Pearl, L.H. and Prodromou, C. (2006) Structure and mechanism of the Hsp90 molecular  
648 chaperone machinery. *Annu Rev Biochem* 75: 271-294.
- 649 Peng, Y., van Wersch, R. and Zhang, Y. (2018) Convergent and Divergent Signaling in  
650 PAMP-Triggered Immunity and Effector-Triggered Immunity. *Mol Plant Microbe*  
651 *Interact* 31: 403-409.
- 652 Qi, Y., Tsuda, K., Glazebrook, J. and Katagiri, F. (2011) Physical association of pattern-  
653 triggered immunity (PTI) and effector-triggered immunity (ETI) immune receptors  
654 in Arabidopsis. *Mol Plant Pathol* 12: 702-708.
- 655 Sander, E.E., van Delft, S., ten Klooster, J.P., Reid, T., van der Kammen, R.A., Michiels,  
656 F., et al. (1998) Matrix-dependent Tiam1/Rac signaling in epithelial cells promotes  
657 either cell-cell adhesion or cell migration and is regulated by phosphatidylinositol  
658 3-kinase. *J Cell Biol* 143: 1385-1398.
- 659 Shirasu, K., Lahaye, T., Tan, M.W., Zhou, F., Azevedo, C. and Schulze-Lefert, P. (1999)  
660 A novel class of eukaryotic zinc-binding proteins is required for disease resistance  
661 signaling in barley and development in *C. elegans*. *Cell* 99: 355-366.
- 662 Takahashi, A., Casais, C., Ichimura, K. and Shirasu, K. (2003) HSP90 interacts with  
663 RAR1 and SGT1 and is essential for RPS2-mediated disease resistance in  
664 Arabidopsis. *Proc Natl Acad Sci U S A* 100: 11777-11782.
- 665 Takeuchi, M., Ueda, T., Sato, K., Abe, H., Nagata, T. and Nakano, A. (2000) A dominant  
666 negative mutant of sar1 GTPase inhibits protein transport from the endoplasmic  
667 reticulum to the Golgi apparatus in tobacco and Arabidopsis cultured cells. *Plant J*  
668 23: 517-525.

- 669 Tamai, A. and Meshi, T. (2001) Cell-to-cell movement of Potato virus X: the role of p12  
670 and p8 encoded by the second and third open reading frames of the triple gene  
671 block. *Mol Plant Microbe Interact* 14: 1158-1167.
- 672 Tao, Y., Xie, Z., Chen, W., Glazebrook, J., Chang, H.S., Han, B., et al. (2003)  
673 Quantitative nature of Arabidopsis responses during compatible and incompatible  
674 interactions with the bacterial pathogen *Pseudomonas syringae*. *Plant Cell* 15:  
675 317-330.
- 676 Thao, N.P., Chen, L., Nakashima, A., Hara, S., Umemura, K., Takahashi, A., et al. (2007)  
677 RAR1 and HSP90 form a complex with Rac/Rop GTPase and function in innate-  
678 immune responses in rice. *Plant Cell* 19: 4035-4045.
- 679 Thomma, B.P., Nurnberger, T. and Joosten, M.H. (2011) Of PAMPs and effectors: the  
680 blurred PTI-ETI dichotomy. *Plant Cell* 23: 4-15.
- 681 Tsuda, K. and Katagiri, F. (2010) Comparing signaling mechanisms engaged in pattern-  
682 triggered and effector-triggered immunity. *Curr Opin Plant Biol* 13: 459-465.
- 683 Tsuda, K., Mine, A., Bethke, G., Igarashi, D., Botanga, C.J., Tsuda, Y., et al. (2013) Dual  
684 regulation of gene expression mediated by extended MAPK activation and salicylic  
685 acid contributes to robust innate immunity in *Arabidopsis thaliana*. *PLoS genetics*  
686 9: e1004015.
- 687 Wang, Q., Li, Y., Ishikawa, K., Kosami, K.I., Uno, K., Nagawa, S., et al. (2018) Resistance  
688 protein Pit interacts with the GEF OsSPK1 to activate OsRac1 and trigger rice  
689 immunity. *Proc Natl Acad Sci U S A* 115: E11551-E11560.
- 690 Wong, H.L., Akamatsu, A., Wang, Q., Higuchi, M., Matsuda, T., Okuda, J., et al. (2018)  
691 In vivo monitoring of plant small GTPase activation using a Forster resonance  
692 energy transfer biosensor. *Plant Methods* 14: 56.
- 693 Wong, H.L., Pinontoan, R., Hayashi, K., Tabata, R., Yaeno, T., Hasegawa, K., et al.  
694 (2007) Regulation of rice NADPH oxidase by binding of Rac GTPase to its N-  
695 terminal extension. *Plant Cell* 19: 4022-4034.
- 696 Yalovsky, S., Bloch, D., Sorek, N. and Kost, B. (2008) Regulation of membrane trafficking,  
697 cytoskeleton dynamics, and cell polarity by ROP/RAC GTPases. *Plant Physiol* 147:  
698 1527-1543.
- 699 Yuan, M., Jian, Z., Bi, G., Nomura, K., Liu, M., He, S.Y., et al. (2020) Pattern-recognition  
700 receptors are required for NLR-mediated plant immunity. *bioRxiv*  
701 <https://doi.org/10.1101/2020.04.10.031294>.

702

703 **Legends to Figures**

704 **Fig. 1 OsRac1 forms two distinct immune receptor complexes**

705 (A) *In vivo* interaction between the chitin receptor OsCERK1 and the NLR protein Pit.  
706 Co-IP was performed using an anti-HA and anti-FLAG antibodies, and the proteins were  
707 detected by immunoblot with the indicated antibodies. (B) BiFC assay between  
708 OsCERK1 and Pit. Expression of the indicated genes was driven by the CaMV 35S  
709 promoter. The graph shows the percentage of BiFC positive cells. Scale bars, 5  $\mu$ m. (C)  
710 Representative VIAFM images of rice protoplasts expressing Pit-WT-mEGFP and  
711 OsCERK1-mCherry. Left, center, and right panels are GFP, mCherry, and merged  
712 images, respectively. Scale bar, 5  $\mu$ m.

713

714 **Fig. 2 Components of OsCERK1- and Pit-containing immune complexes**

715 (A, B) Co-IP of (A) OsCERK1- and (B) Pit-containing immune complexes. Co-IP was  
716 performed using anti-FLAG antibody, and the proteins were detected by immunoblot with  
717 the indicated antibodies. (C) Distribution of defense-related proteins. An aqueous two-  
718 phase partitioning experiment was performed and the proteins were detected by  
719 immunoblot with the indicated antibodies. (D) Localization of OsCERK1 and Pit in rice  
720 protoplasts in the presence of BFA. OsCERK1-GFP or Pit1-Venus was co-transfected  
721 with mCherry. Sixteen hours after BFA treatment, the transfected cells were observed  
722 under a microscope. Scale bars, 5  $\mu$ m.

723

724 **Fig. 3 Active OsRac1 forms a large immune complex after chitin treatment**

725 (A) GST-PAK CRIB pull-down assay using rice suspension cells expressing a dominant-  
726 negative mutant of *OsRac1* (*DN-OsRac1*) and a constitutively active mutant  
727 of *OsRac1* (*CA-OsRac1*). The band of GTP•*OsRac1* indicates the amount of the active  
728 form of *OsRac1*. (B) Monitoring *OsRac1* activation after chitin treatment. Rice  
729 suspension cells expressing myc-*OsRac1* WT were treated with chitin and the resultant  
730 cell lysates were subjected to GST-PAK CRIB pull-down assay to detect *OsRac1*  
731 activation. The graph indicates the band intensity analyzed by ImageJ software. Error  
732 bars indicate the SD. Different letters above bars indicate a significant difference  
733 determined by Student's *t*-test ( $P < 0.05$ ). (C) Gel filtration fractions of protein extracts  
734 from rice suspension cells expressing *OsRac1* WT before and after chitin treatment  
735 (upper and lower panels) were subjected to immunoblot analyses using an anti-Myc  
736 antibody. Fraction numbers and relative molecular masses (kDa) are indicated at the top  
737 and bottom, respectively. (D) Combined high-molecular-weight *OsRac1* fractions (HOR)  
738 (fractions 23–25 in (C)) or low-molecular-weight *OsRac1* fractions (LOR) (fractions 29–  
739 31) were applied to GST-PAK CRIB pull-down assay to monitor *OsRac1* activation. (E)  
740 Gel filtration fractions of protein extracts from rice suspension cells expressing *OsRac1*  
741 WT, CA, and DN. Fraction numbers and relative molecular masses (kD) are indicated at  
742 the top and bottom, respectively. (F) Components of the *OsCERK1* complex after chitin  
743 treatment. *OsCERK1*-FLAG was immunoprecipitated with an anti-FLAG antibody. The  
744 precipitates were immunoblotted with the indicated antibodies.

745

746 **Fig. 4 Active-form Pit shifts *OsRac1* to the larger immune complex**

747 (A) Induction of constitutively active *Pit* (*Pit D485V*) mRNA and protein by estradiol  
748 treatment. (B) Expression of *Pit D485V* triggers *OsRac1* activation. After the induction of  
749 *Pit D485V* by estradiol, we carried out a GST-PAK CRIB pull-down assay to detect  
750 *OsRac1* activation. (C) Defense gene *PAL1* is induced by the expression of *Pit D485V*.

751 (D) Gel filtration fractions of protein extract from rice suspension cells expressing  
752 OsRac1 WT before and after Pit D485V induction. Fraction numbers and relative  
753 molecular masses (kD) are indicated at the top and bottom, respectively. (E) Interaction  
754 between Pit and OsRac1 after chitin treatment. After chitin treatment, Pit-FLAG was  
755 precipitated by an anti-FLAG antibody. The resultant precipitates were immunoblotted  
756 with anti-Myc antibody.

757

### 758 **Fig. 5 Hsp90 contributes to Pit-induced immunity**

759 (A) Suppression of Pit-triggered cell death and ROS production by the Hsp90 inhibitor  
760 GDA. In the presence or absence of GDA, Pit D485V-induced cell death (left image) and  
761 ROS (right image) were examined in *N. benthamiana* leaves. (B) Suppression of Pit  
762 D485V-induced cell death by virus-induced gene silencing (VIGS) of Hsp90. *N.*  
763 *benthamiana* plants were inoculated with pGPVX:GFP or pGPVX:Hsp90 (10-186), and  
764 three weeks later the upper leaves were infiltrated with a mixture of *Agrobacterium*  
765 cultures carrying pGWB2-Pit D485V transgenes. Cell death developed by 7 days after  
766 inoculation (upper panels). mRNA expression of *Hsp90* and the internal  
767 control *Actin* was detected by RT-PCR (lower panels). (C) Inhibition of *Pit D485V*-  
768 induced *PAL1* expression by treatment of with GDA. mRNA expression of *PAL1*, *Pit*,  
769 *OsRac1*, *Hsp90*, and *Actin* was detected by RT-PCR. (D) Localization of Pit-Venus in  
770 rice protoplasts in the presence of GDA. Pit-Venus was co-transfected with mCherry.  
771 Twelve hours after GDA treatment, the transfected cells were observed under a  
772 microscope. Scale bars, 5  $\mu$ m.

773

774



775 **Table1 List of primers**

776

| Primer name    | Primer sequence                      |
|----------------|--------------------------------------|
| Myc-OsRac1 F   | 5'-AGCTTGGGCGACCTCACCTCTG-3'         |
| Myc-OsRac1 R   | 5'-ACATCCTTATGTCTTGGAGGTTG-3'        |
| OsCERK1-FLAG F | 5'-CACCATGTTTAGTATTGGCAATAAAATAGG-3' |
| OsCERK1-FLAG R | 5'-GCTGTTATCAACCACTTTGTA-3'          |
| Pit-FLAG F     | 5'-GCCAGATGCCAGAACTGCTA-3'           |
| Pit-FLAG R     | 5'-GCTGTTATCAACCACTTTGTA-3'          |
| PAL1 F         | 5'-CTACCCGCTGATGAAGAAGC-3'           |
| PAL1 R         | 5'-AACCTGCCACTCGTACCAAGTTTTGC-3'     |

777

778

779

780

781

782

783



# Akamatsu et al., Figure 1

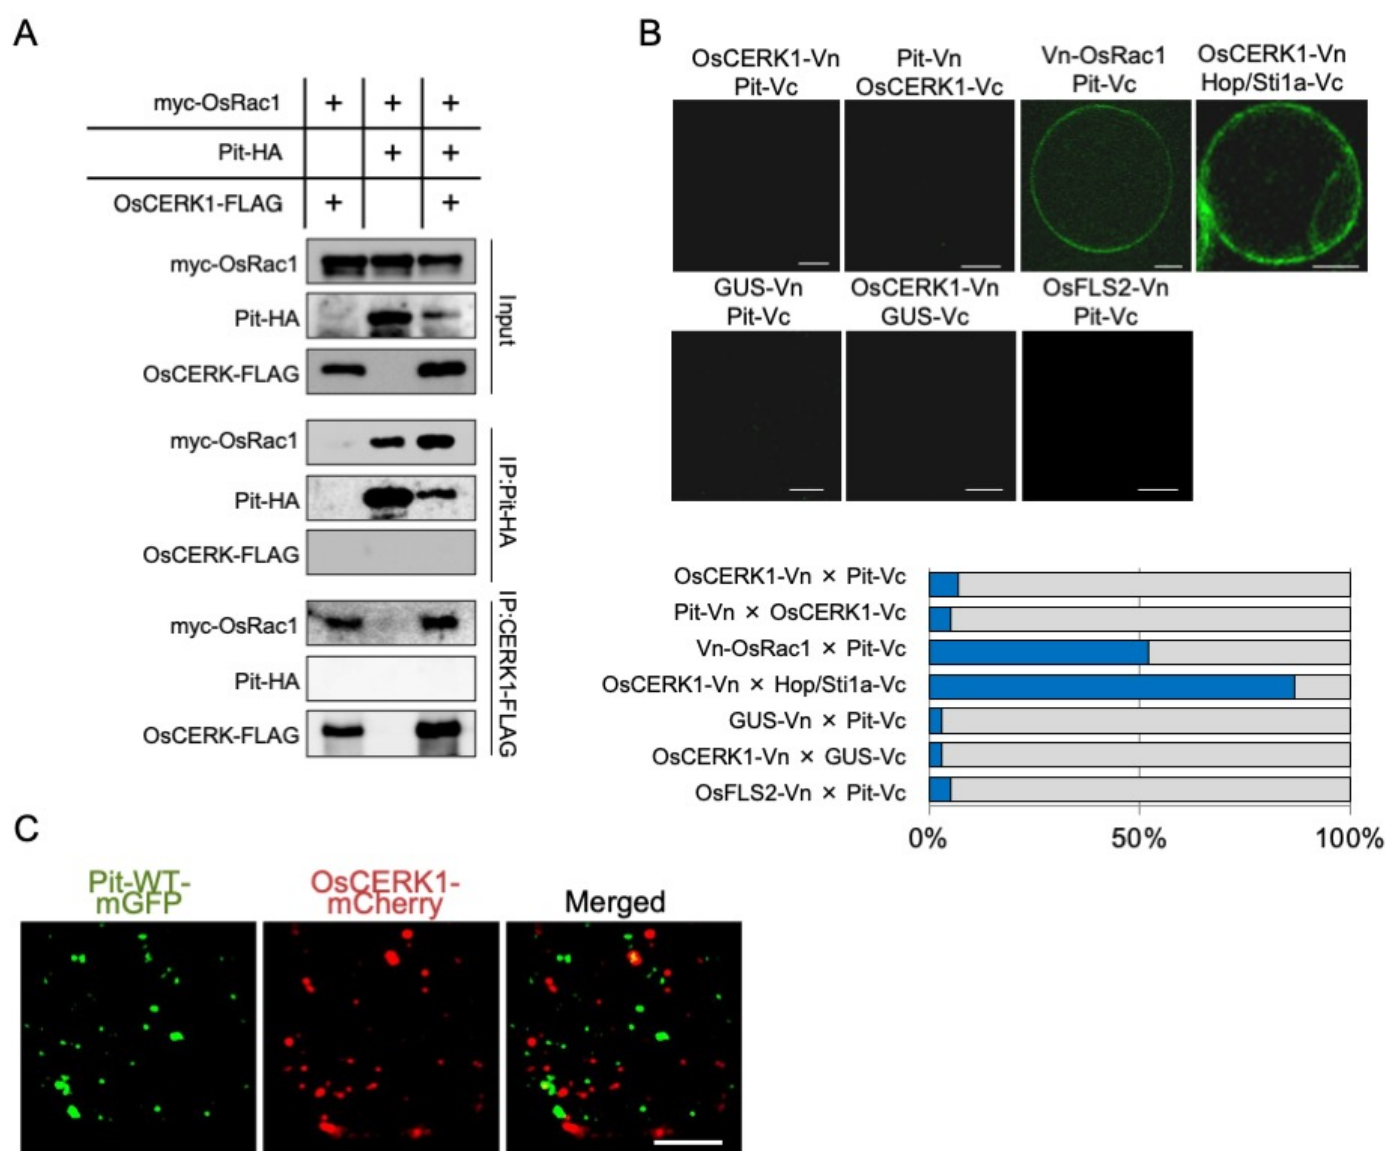

## Fig. 1 OsRac1 forms two distinct immune receptor complexes

(A) *In vivo* interaction between the chitin receptor OsCERK1 and the NLR protein Pit. Co-IP was performed using an anti-HA and anti-FLAG antibodies, and the proteins were detected by immunoblot with the indicated antibodies. (B) BiFC assay between OsCERK1 and Pit. Expression of the indicated genes was driven by the CaMV 35S promoter. The graph shows the percentage of BiFC positive cells. Scale bars, 5  $\mu$ m. (C) Representative VIAFM images of rice protoplasts expressing Pit-WT-mEGFP and OsCERK1-mCherry. Left, center, and right panels are GFP, mCherry, and merged images, respectively. Scale bar, 5  $\mu$ m.

## Akamatsu et al., Figure 2

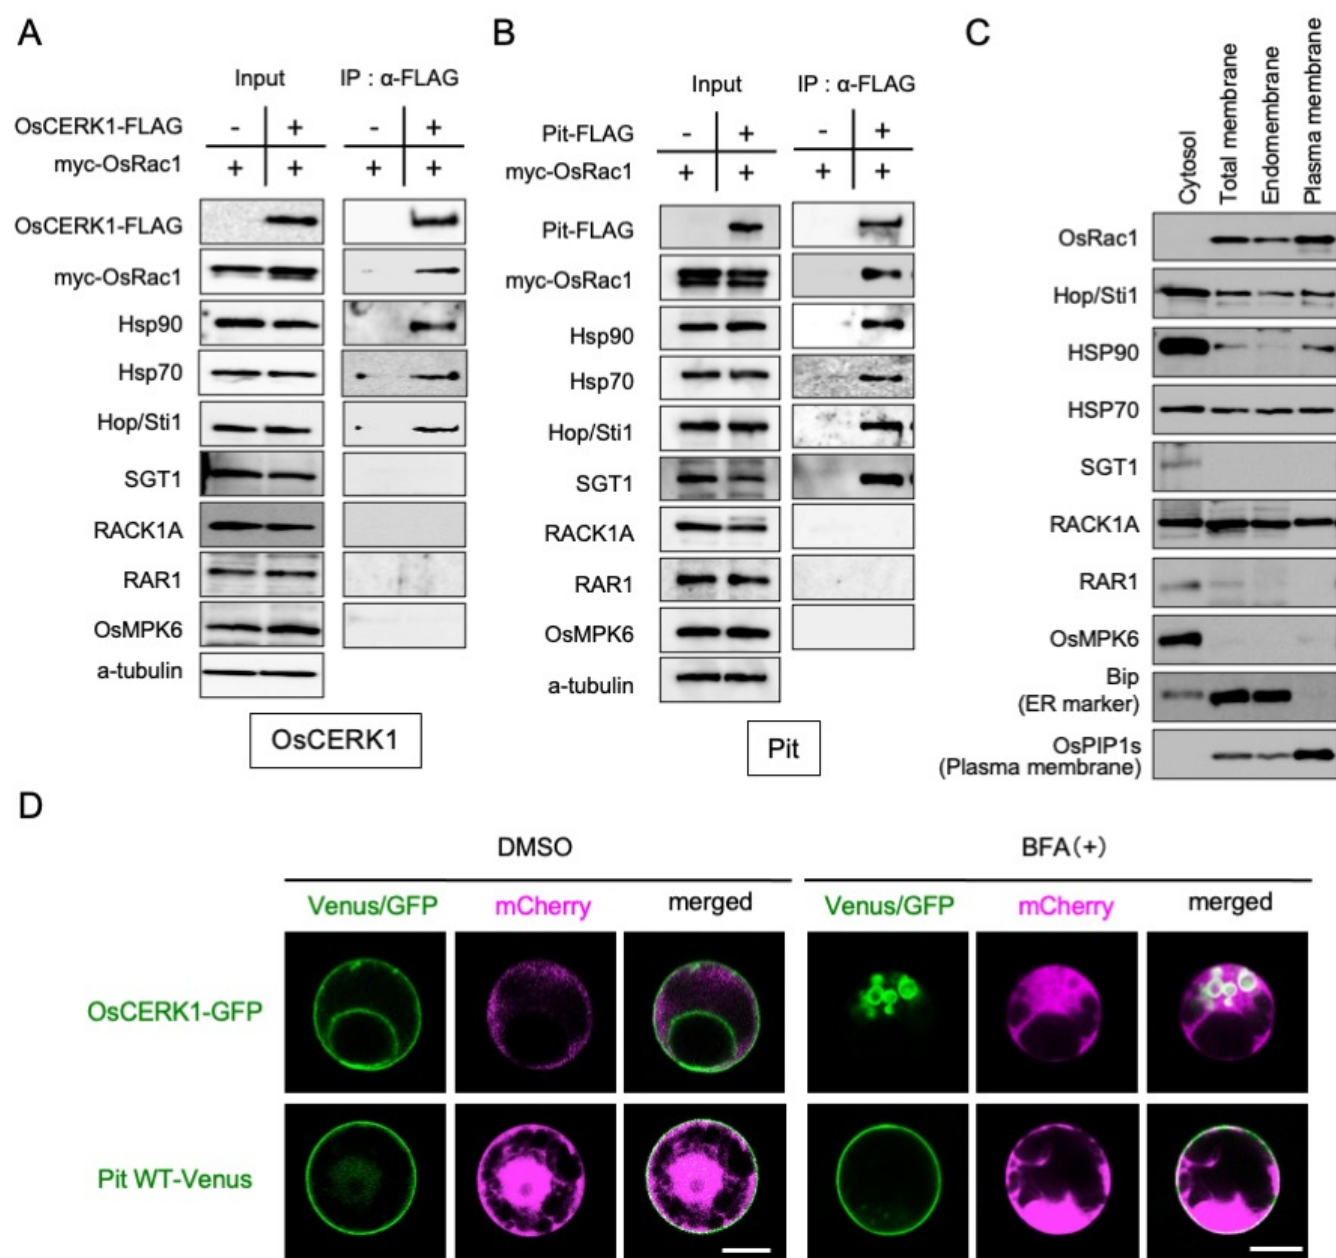

**Fig. 2 Components of OsCERK1- and Pit-containing immune complexes**

(A, B) Co-IP of (A) OsCERK1- and (B) Pit-containing immune complexes. Co-IP was performed using anti-FLAG antibody, and the proteins were detected by immunoblot with the indicated antibodies. (C) Distribution of defense-related proteins. An aqueous two-phase partitioning experiment was performed and the proteins were detected by immunoblot with the indicated antibodies. (D) Localization of OsCERK1 and Pit in rice protoplasts in the presence of BFA. OsCERK1-GFP or Pit1-Venus was co-transfected with mCherry. Sixteen hours after BFA treatment, the transfected cells were observed under a microscope. Scale bars, 5  $\mu$ m.

## Akamatsu et al., Figure 3

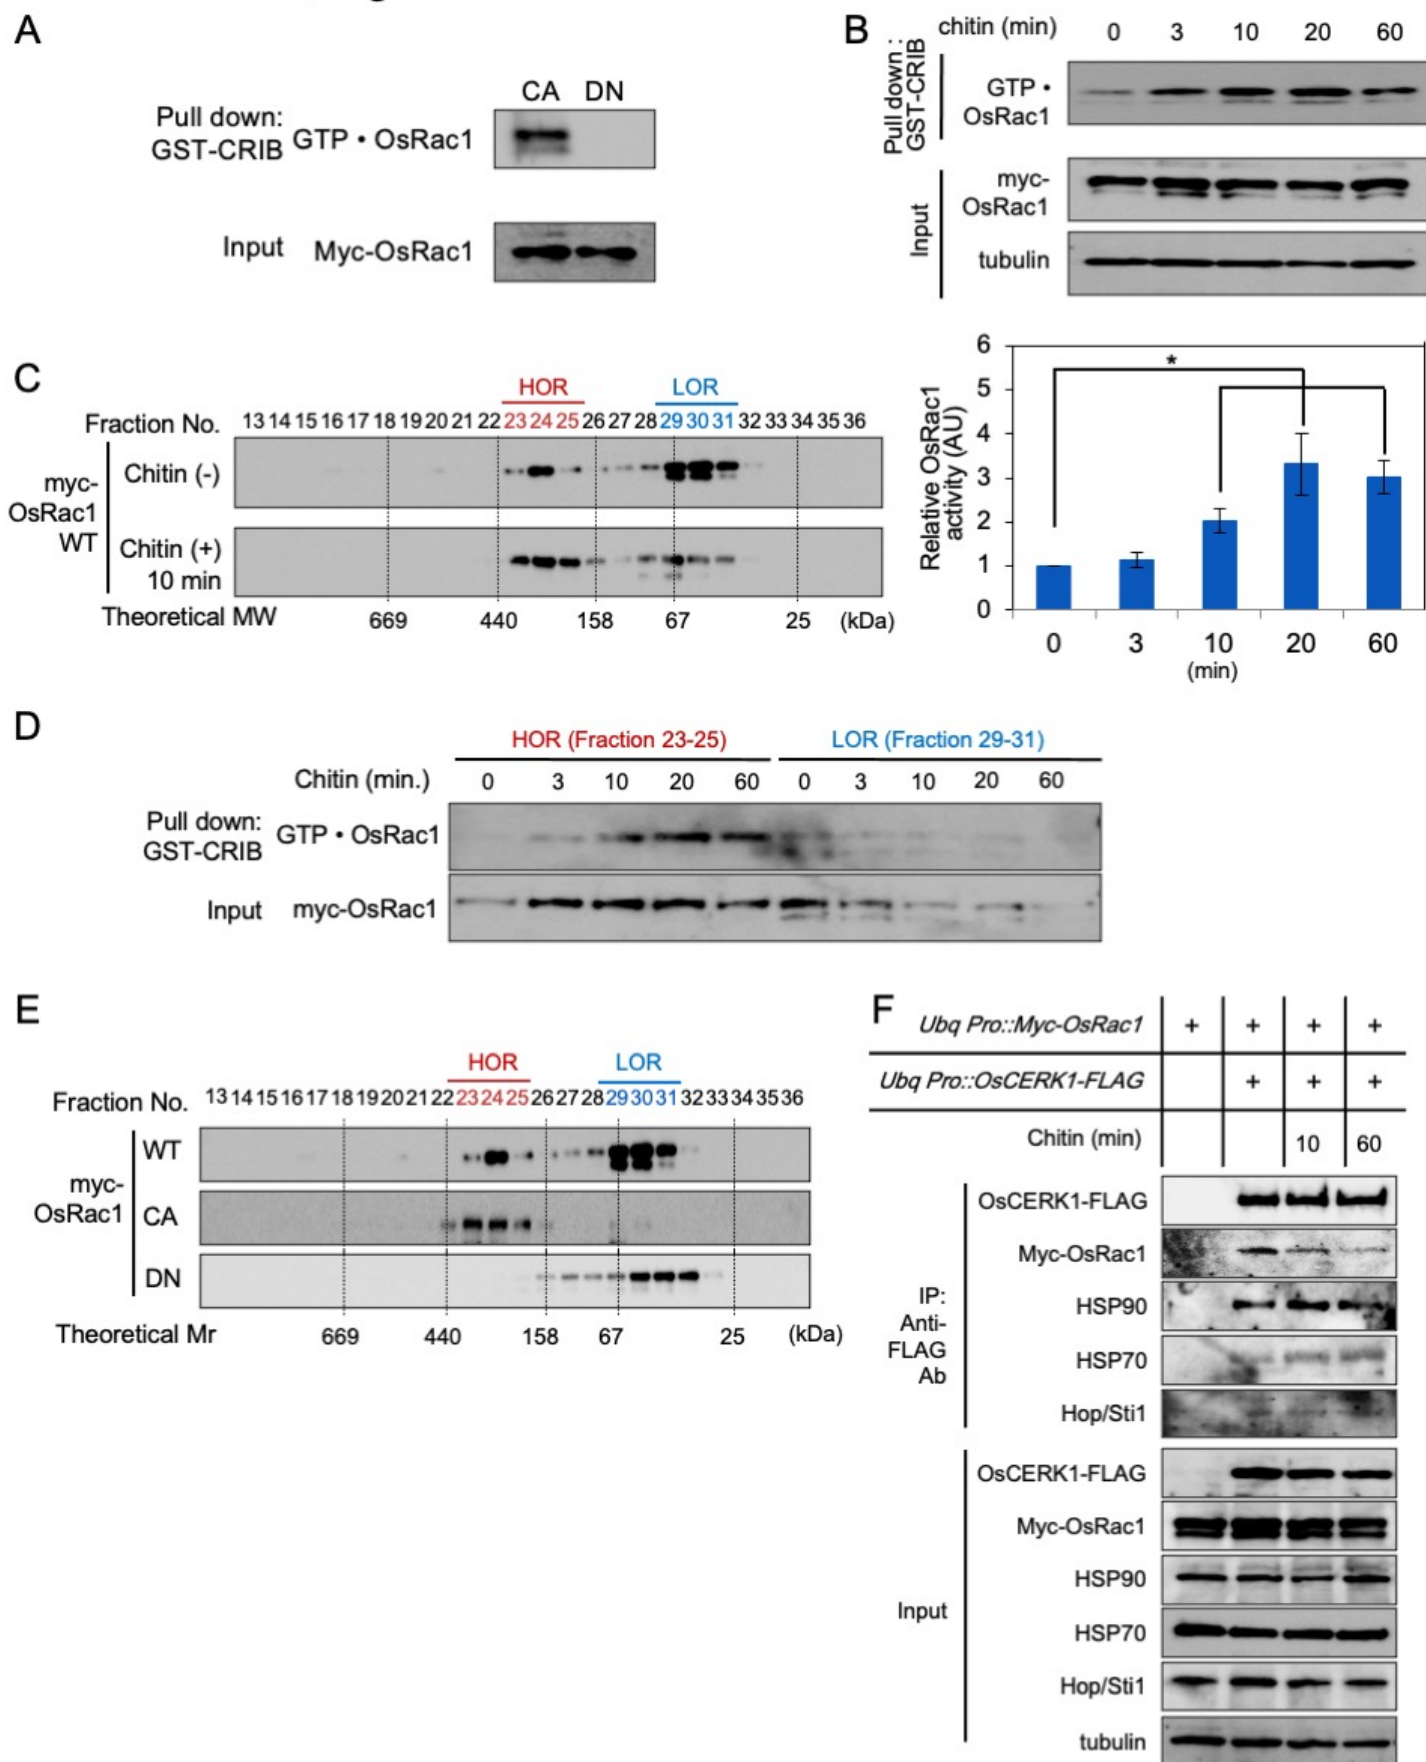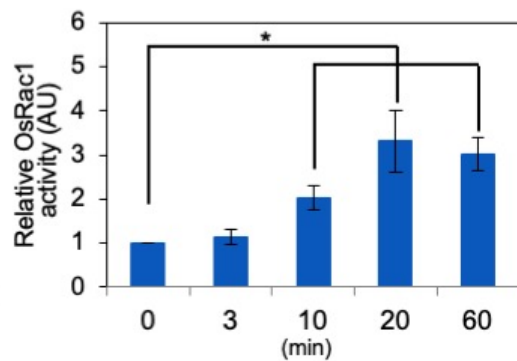



### Fig. 3 Active OsRac1 forms a large immune complex after chitin treatment

(A) GST-PAK CRIB pull-down assay using rice suspension cells expressing a dominant-negative mutant of *OsRac1* (*DN-OsRac1*) and a constitutively active mutant of *OsRac1* (*CA-OsRac1*). The band of GTP•OsRac1 indicates the amount of the active form of OsRac1. (B) Monitoring OsRac1 activation after chitin treatment. Rice suspension cells expressing myc-OsRac1 WT were treated with chitin and the resultant cell lysates were subjected to GST-PAK CRIB pull-down assay to detect OsRac1 activation. The graph indicates the band intensity analyzed by ImageJ software. Error bars indicate the SD. Different letters above bars indicate a significant difference determined by Student's *t*-test ( $P < 0.05$ ). (C) Gel filtration fractions of protein extracts from rice suspension cells expressing *OsRac1* WT before and after chitin treatment (upper and lower panels) were subjected to immunoblot analyses using an anti-Myc antibody. Fraction numbers and relative molecular masses (kDa) are indicated at the top and bottom, respectively. (D) Combined high-molecular-weight OsRac1 fractions (HOR) (fractions 23–25 in (C)) or low-molecular-weight OsRac1 fractions (LOR) (fractions 29–31) were applied to GST-PAK CRIB pull-down assay to monitor OsRac1 activation. (E) Gel filtration fractions of protein extracts from rice suspension cells expressing *OsRac1* WT, CA, and DN. Fraction numbers and relative molecular masses (kD) are indicated at the top and bottom, respectively. (F) Components of the OsCERK1 complex after chitin treatment. OsCERK1-FLAG was immunoprecipitated with an anti-FLAG antibody. The precipitates were immunoblotted with the indicated antibodies.

## Akamatsu et al., Figure 4

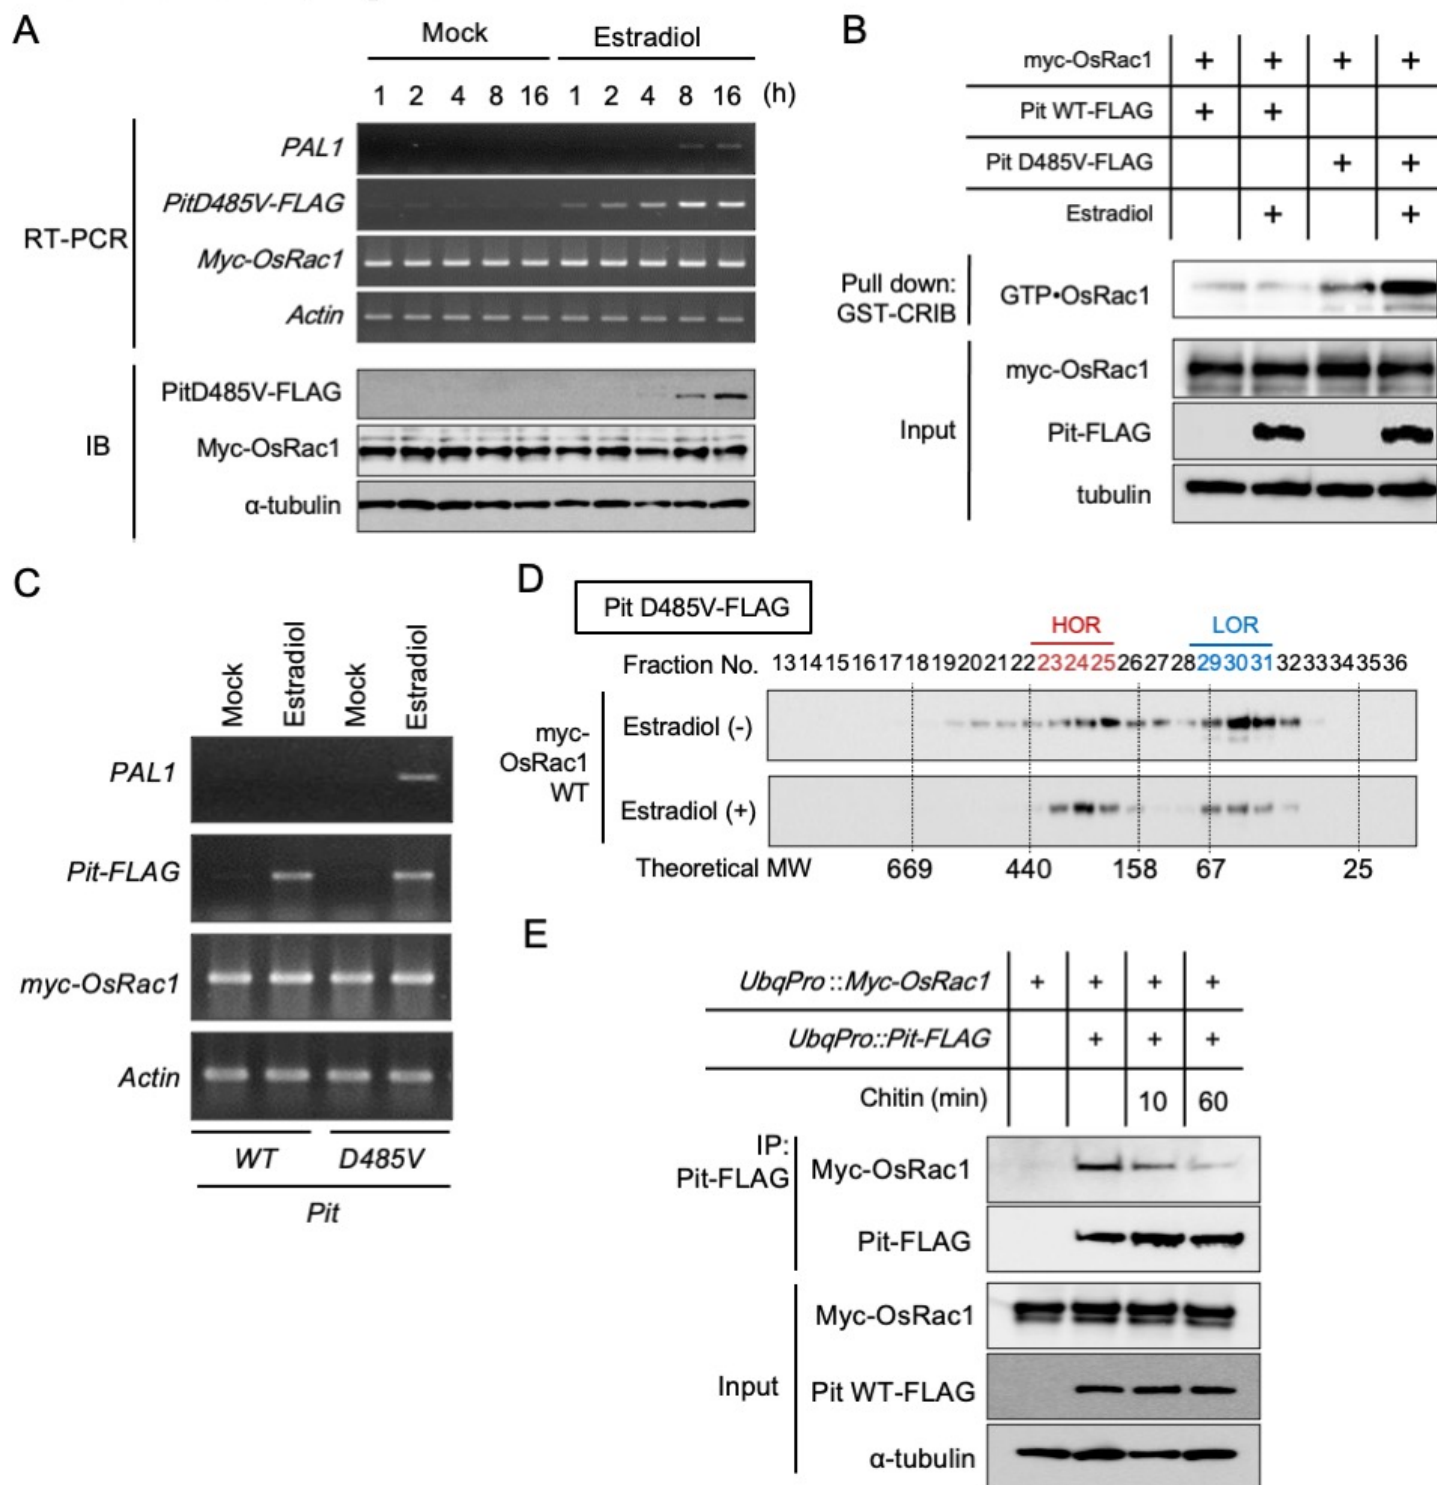

### Fig. 4 Active-form Pit shifts OsRac1 to the larger immune complex

(A) Induction of constitutively active *Pit* (*Pit D485V*) mRNA and protein by estradiol treatment. (B) Expression of *Pit D485V* triggers *OsRac1* activation. After the induction of *Pit D485V* by estradiol, we carried out a GST-PAK CRIB pull-down assay to detect *OsRac1* activation. (C) Defense gene *PAL1* is induced by the expression of *Pit D485V*. (D) Gel filtration fractions of protein extract from rice suspension cells expressing *OsRac1* WT before and after *Pit D485V* induction. Fraction numbers and relative molecular masses (kD) are indicated at the top and bottom, respectively. (E) Interaction between *Pit* and *OsRac1* after chitin treatment. After chitin treatment, *Pit-FLAG* was precipitated by an anti-FLAG antibody. The resultant precipitates were immunoblotted with anti-Myc antibody.

## Akamatsu et al., Figure 5

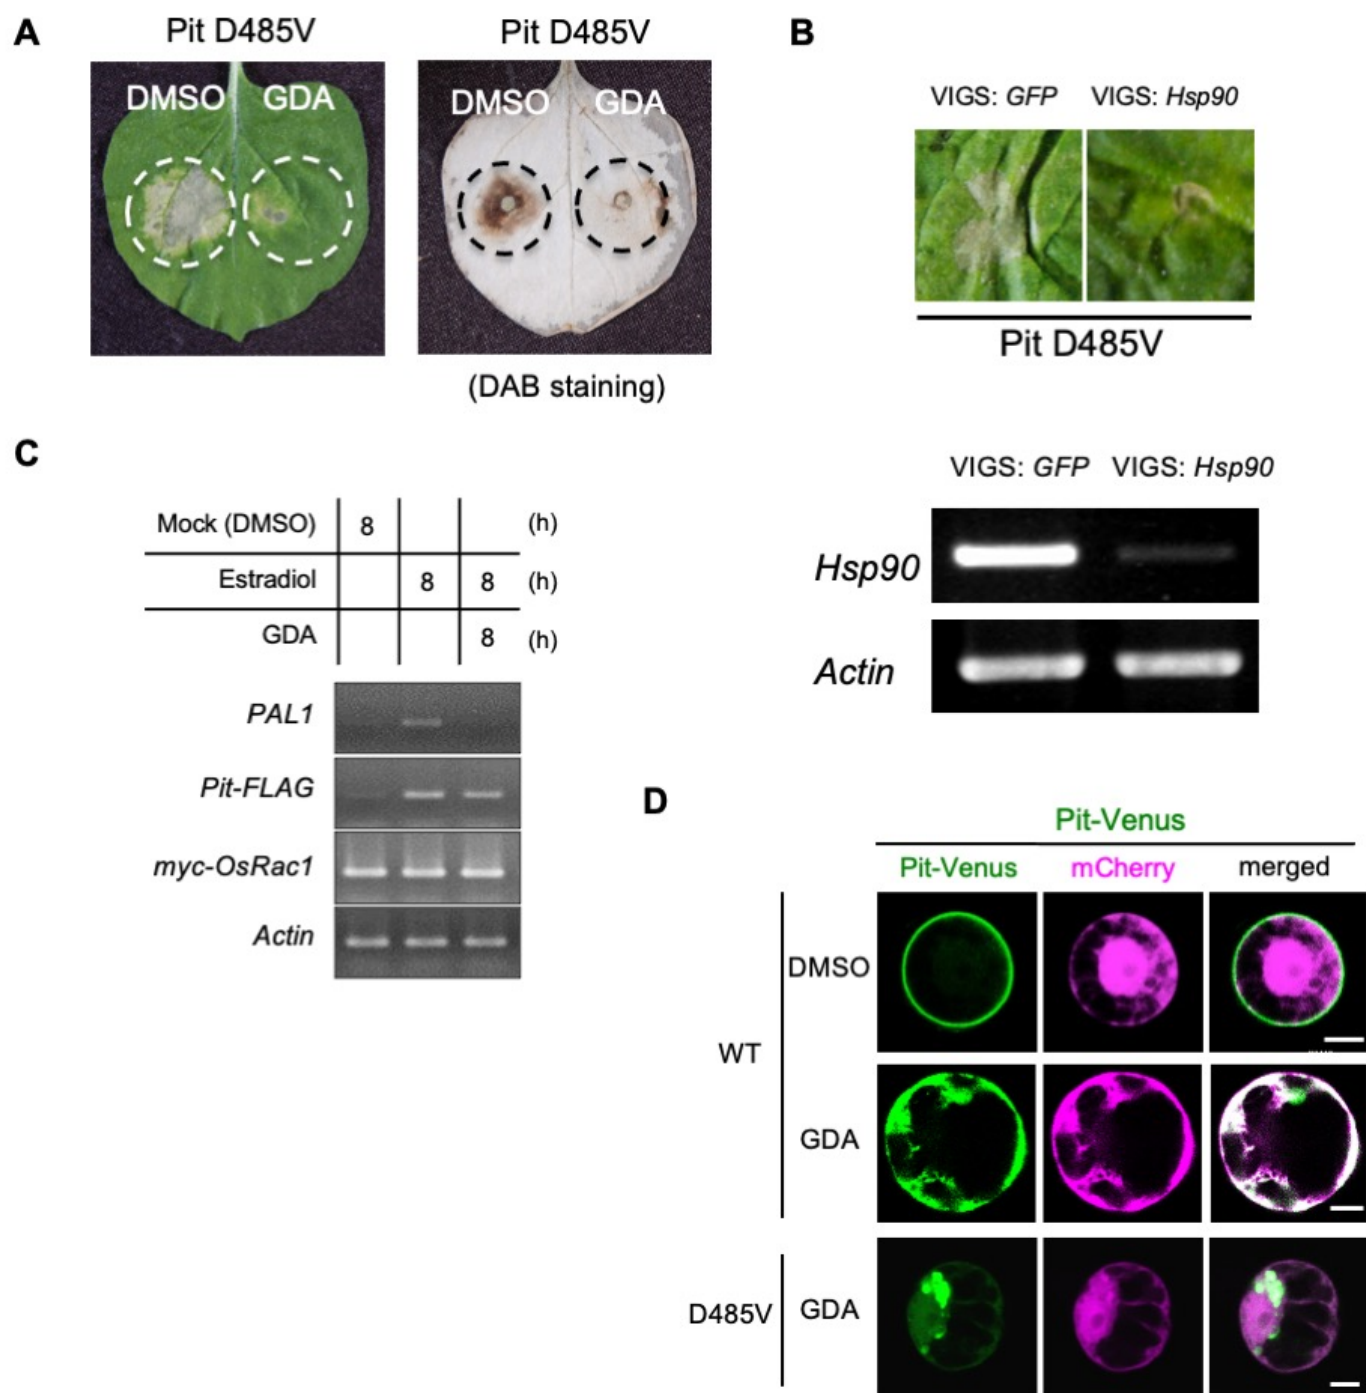

### Fig. 5 Hsp90 contributes to Pit-induced immunity

(A) Suppression of Pit-triggered cell death and ROS production by the Hsp90 inhibitor GDA. In the presence or absence of GDA, Pit D485V-induced cell death (left image) and ROS (right image) were examined in *N. benthamiana* leaves. (B) Suppression of Pit D485V-induced cell death by virus-induced gene silencing (VIGS) of Hsp90. *N. benthamiana* plants were inoculated with pGPVX:GFP or pGPVX:Hsp90 (10-186), and three weeks later the upper leaves were infiltrated with a mixture of *Agrobacterium* cultures carrying pGWB2-Pit D485V transgenes. Cell death developed by 7 days after inoculation (upper panels). mRNA expression of *Hsp90* and the internal control *Actin* was detected by RT-PCR (lower panels). (C) Inhibition of Pit D485V-induced *PAL1* expression by treatment of with GDA. mRNA expression of *PAL1*, *Pit*, *OsRac1*, *Hsp90*, and *Actin* was detected by RT-PCR. (D) Localization of Pit-Venus in rice protoplasts in the presence of GDA. Pit-Venus was co-transfected with mCherry. Twelve hours after GDA treatment, the transfected cells were observed under a microscope. Scale bars, 5  $\mu$ m.



## Akamatsu et al., Figure S1

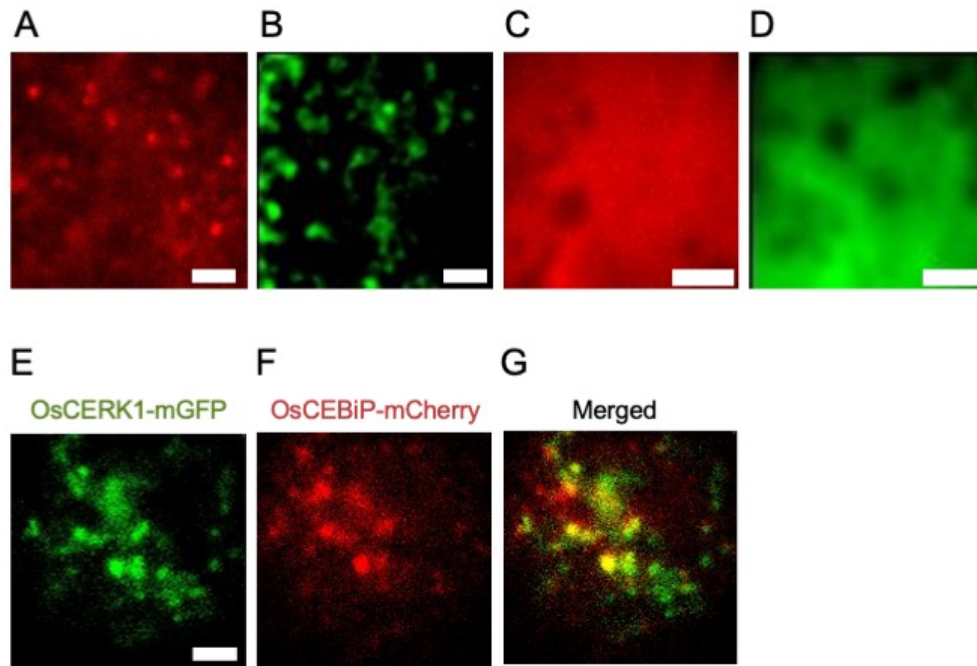

### Supplementary Figure 1

VIAFM images of the immune receptors.

Representative image of OsCERK1-mCherry (A), Pit-mEGFP (B), mCherry (C), and mEGFP (D). E-F, co-expression of OsCERK1-mGFP and OsCEBiP-mCherry. Scale bar is 5  $\mu$ m.
